# Supplementary material
Source: PubMed Central journal article supplement (PMC7927942)
Supplement: NIHMS1673019-supplement-SI_MetaD_JH2_pdf.pdf [file NIHMS1673019-supplement-SI_MetaD_JH2_pdf.pdf]

# Metadynamics as a Post-Processing Method for Virtual Screening with Application to the Pseudokinase Domain of JAK2

## Supporting Information

*Kara J. Cutrona, Ana S. Newton, Stefan G. Krimmer, Julian Tirado-Rives,  
and William L. Jorgensen\**

Department of Chemistry, Yale University, New Haven, Connecticut 06520-8107

|                                                                                               |            |
|-----------------------------------------------------------------------------------------------|------------|
| <b>Pre-Metadynamics Equilibration .....</b>                                                   | <b>S3</b>  |
| <b>Figure S1</b> Changes in structure before and after equilibration                          |            |
| <b>PMF Curves of Benchmark Ligands (CS Poses).....</b>                                        | <b>S4</b>  |
| <b>Figure S2.1</b> WC1                                                                        |            |
| <b>Figure S2.2</b> WC2                                                                        |            |
| <b>Figure S2.3</b> Filgotinib                                                                 |            |
| <b>PMF Curves of High Throughput Screen Ligands (CS Poses).....</b>                           | <b>S7</b>  |
| <b>Figure S3.1</b> BI-D1870 (R)                                                               |            |
| <b>Figure S3.2</b> BI-D1870 (S)                                                               |            |
| <b>Figure S3.3</b> PRT06206                                                                   |            |
| <b>Figure S3.4</b> NVP-BSK805                                                                 |            |
| <b>PMF Curves of Jorgensen Lab-Developed JAK2 JH2 Binders (CS Poses).....</b>                 | <b>S11</b> |
| <b>Figure S4.1</b> JAK-67                                                                     |            |
| <b>Figure S4.2</b> JAK-82                                                                     |            |
| <b>Figure S4.3</b> JAK-96                                                                     |            |
| <b>Figure S4.4</b> JAK-118                                                                    |            |
| <b>Figure S4.5</b> JAK-170                                                                    |            |
| <b>Figure S4.6</b> JAK-179                                                                    |            |
| <b>Figure S4.7</b> JAK-190                                                                    |            |
| <b>PMF Curves of Alternate Poses from HTS and Lab-Developed Compounds (Non-CS Poses).....</b> | <b>S18</b> |
| <b>Figure S5.1</b> Peak Heights of Crystal Structure and Alternative Poses                    |            |
| <b>Figure S5.2</b> BI-D1870 (S)                                                               |            |
| <b>Figure S5.3</b> Filgotinib                                                                 |            |
| <b>Figure S5.4</b> JAK-67                                                                     |            |
| <b>Figure S5.5</b> JAK-82                                                                     |            |
| <b>Figure S5.6</b> JAK-96                                                                     |            |
| <b>Figure S5.7</b> JAK-190                                                                    |            |

**PMF Curves of Virtual Screening Results..... S26**

- Figure S6.1** JAK-198
- Figure S6.2** JAK-199
- Figure S6.3** JAK-200
- Figure S6.4** JAK-201
- Figure S6.5** JAK-202
- Figure S6.6** JAK-203
- Figure S6.7** JAK-204
- Figure S6.8** JAK-205
- Figure S6.9** JAK-206
- Figure S6.10** JAK-207
- Figure S6.11** JAK-208
- Figure S6.12** JAK-209
- Figure S6.13** JAK-210
- Figure S6.14** JAK-211
- Figure S6.15** JAK-212
- Figure S6.16** JAK-213
- Figure S6.17** JAK-214
- Figure S6.18** JAK-215
- Figure S6.19** JAK-216
- Figure S6.20** JAK-217
- Figure S6.21** JAK-218
- Figure S6.22** JAK-219
- Figure S6.23** JAK-220
- Figure S6.24** JAK-221
- Figure S6.25** JAK-222
- Figure S6.26** JAK-223
- Figure S6.27** JAK-224
- Figure S6.28** JAK-225
- Figure S6.29** JAK-226
- Figure S6.30** JAK-227

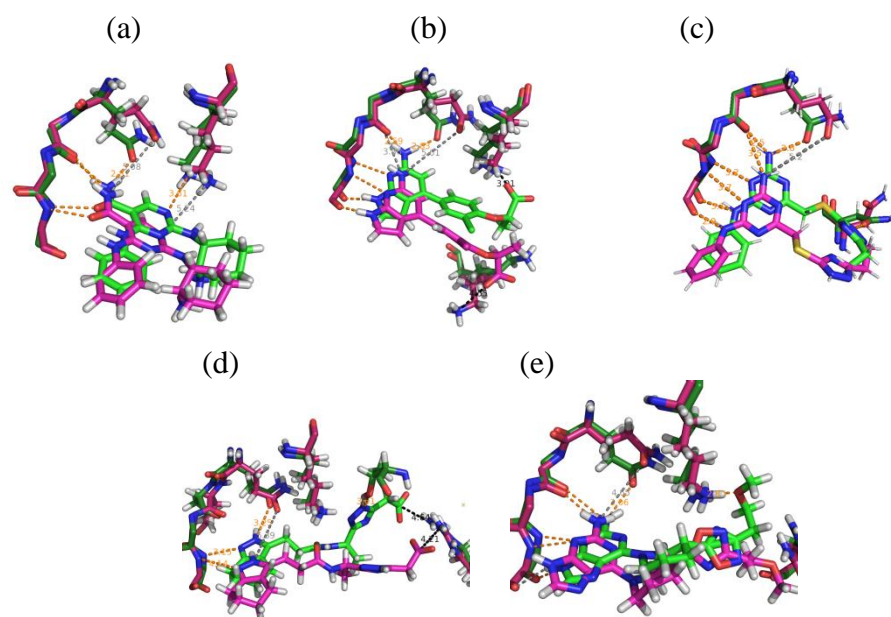

**Figure S1.** Green and pink structures show the changes before and after equilibration, respectively, for the following compounds: (a) PRT-6207629, (b) JAK-206, (c) JAK-207, (d) JAK-223 and (e) JAK-226.

## PMF Curves of Benchmark Ligands (Crystal Structure Poses)

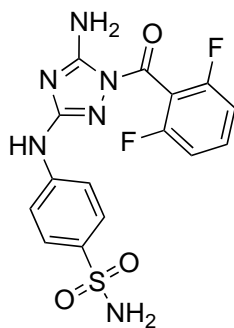

WC1 ( $K_d=0.456 \mu\text{M}$ )

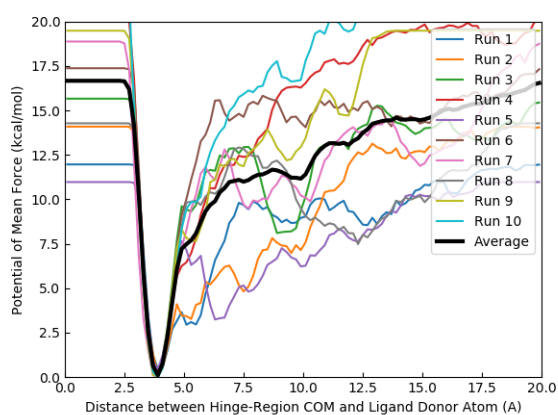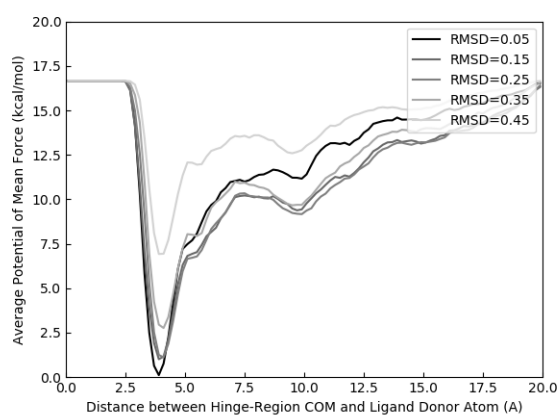

**Figure S2.1.** (a) WC1 structure (b) PMF curve of JH2/WC1 unbinding at 0.05 Å Val629 backbone RMSD (c) PMF curves of JH2/WC1 unbinding at highly-sampled Val629 backbone RMSDs. All PMF curves converged from 0 until at least 10 angstroms.

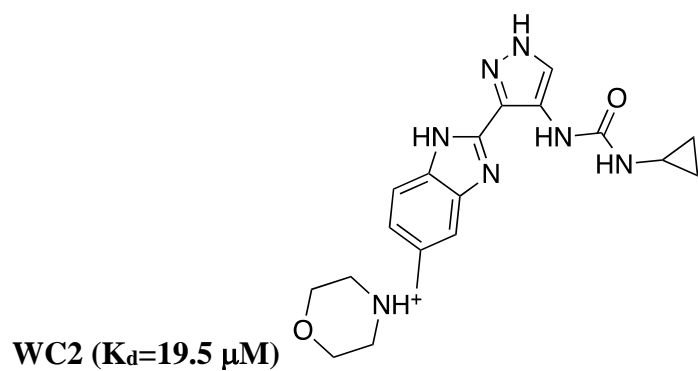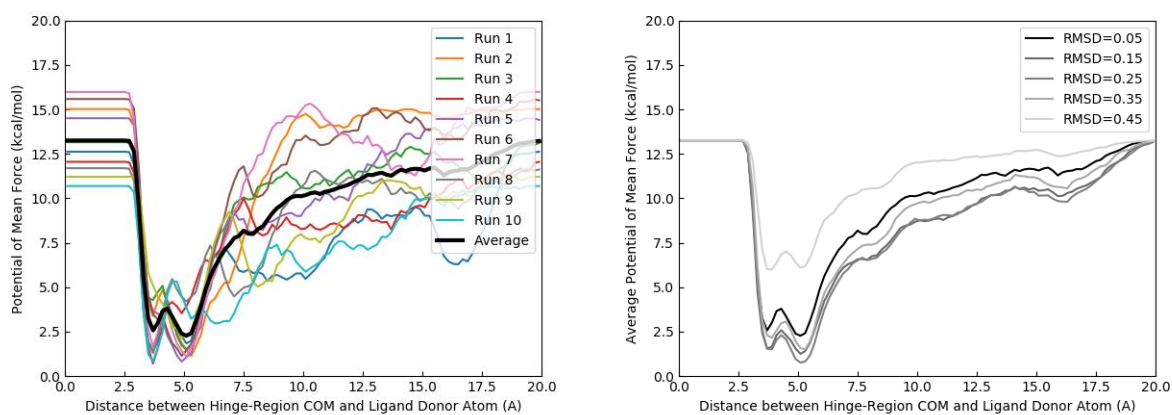

**Figure S2.2.** (a) WC2 structure (b) PMF curve of JH2/WC2 unbinding at 0.05 Å Val629 backbone RMSD (c) PMF curves of JH2/WC2 unbinding at highly-sampled Val629 backbone RMSDs. All PMF curves converged from 0 until at least 10 angstroms.

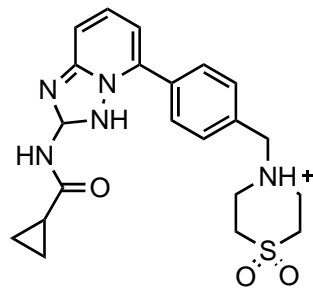

**Filgotinib (Low activity, 9% at 50  $\mu$ M)**

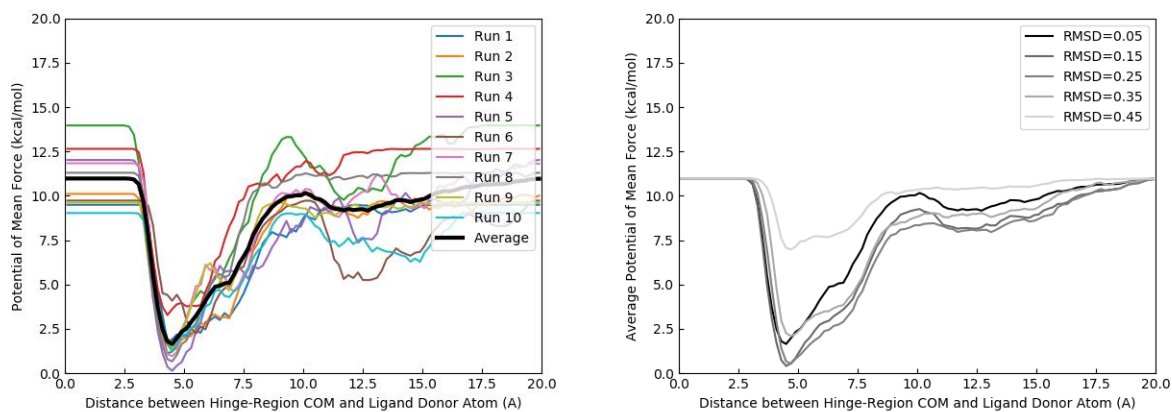

**Figure S2.3.** (a) Filgotinib structure (b) PMF curve of JH2/Filgotinib unbinding at 0.05 Å Val629 backbone RMSD (c) PMF curves of JH2/Filgotinib unbinding at highly-sampled Val629 backbone RMSDs. All PMF curves converged from 0 until at least 10 angstroms.

## PMF Curves of Additional High Throughput Screen Ligands

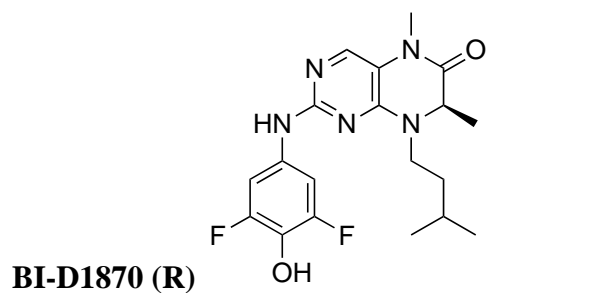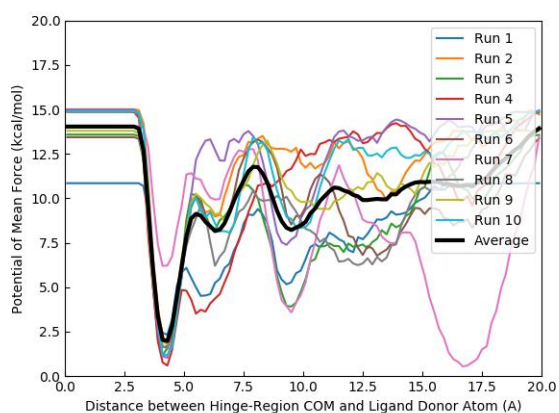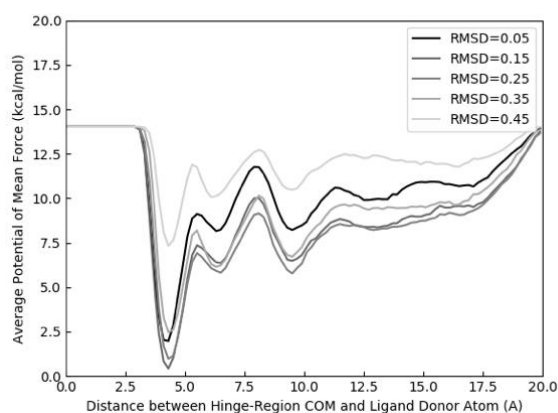

**Figure S3.1.** (a) BI-D1870(R) structure (b) PMF curve of JH2/BI-D1870(R) unbinding at 0.05 Å Val629 backbone RMSD (c) PMF curves of JH2/BI-D1870(R) unbinding at highly-sampled Val629 backbone RMSDs. All PMF curves converged from 0 until at least 10 angstroms.

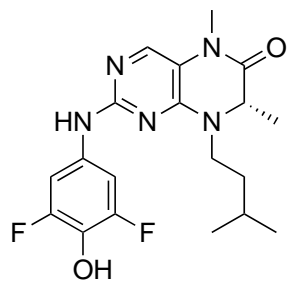

**BI-D1870 (S)**

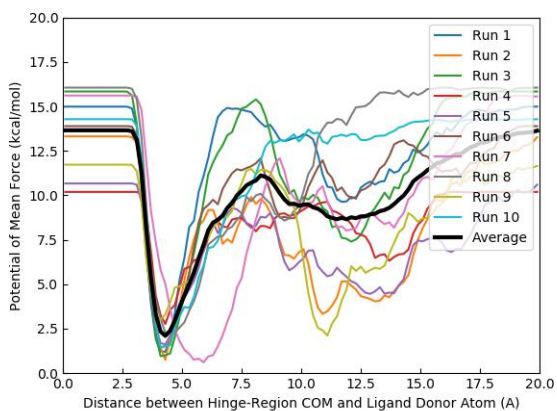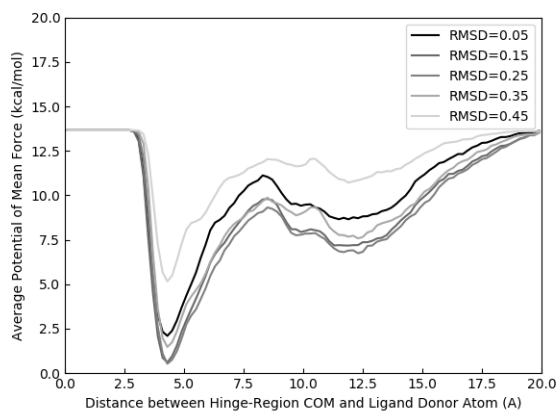

**Figure S3.2.** (a) BI-D1870(S) structure (b) PMF curve of JH2/BI-D1870(S) unbinding at 0.05 Å Val629 backbone RMSD (c) PMF curves of JH2/BI-D1870(S) unbinding at highly-sampled Val629 backbone RMSDs. All PMF curves converged from 0 until at least 10 angstroms.



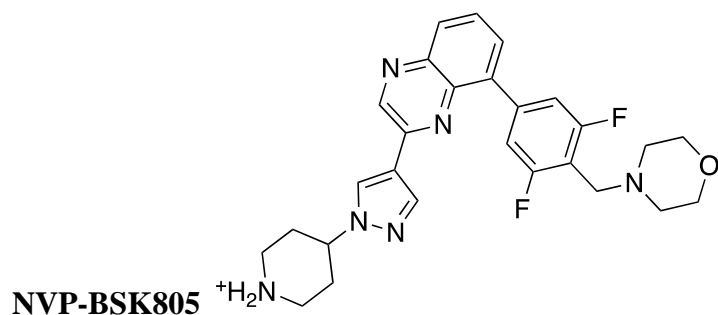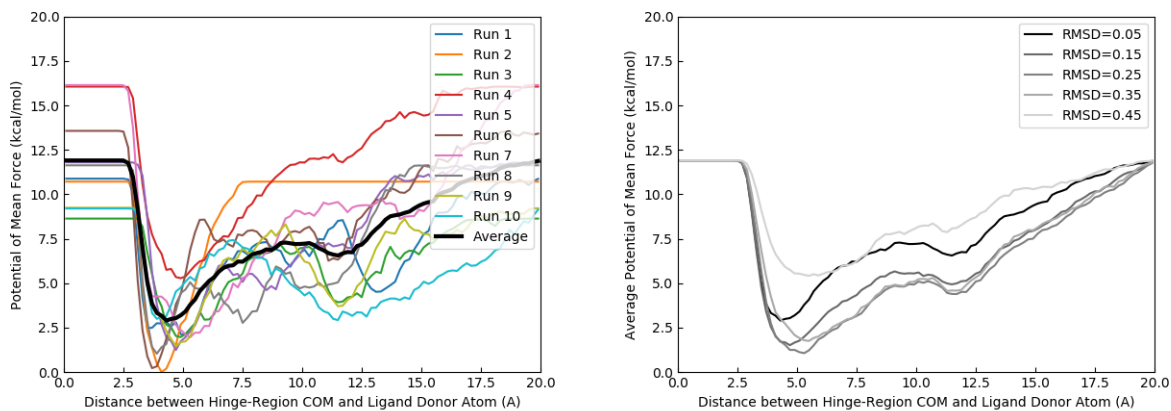

**Figure S3.3.** (a) NVP-BSK805 structure (b) PMF curve of JH2/NVP-BSK805 unbinding at 0.05 Å Val629 backbone RMSD (c) PMF curves of JH2/NVP-BSK805 unbinding at highly-sampled Val629 backbone RMSDs. All PMF curves converged from 0 until at least 10 angstroms. Run 2 was excluded in the PMF curve average because there was not enough sampling at 0.05 Å Val629 backbone RMSD.

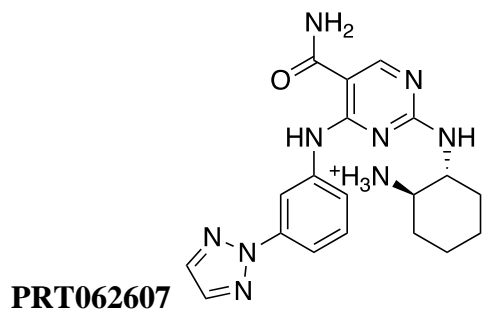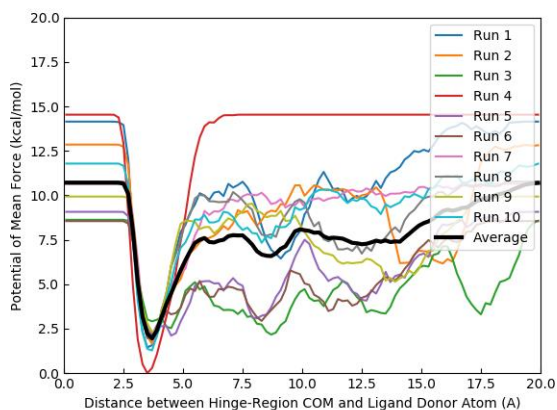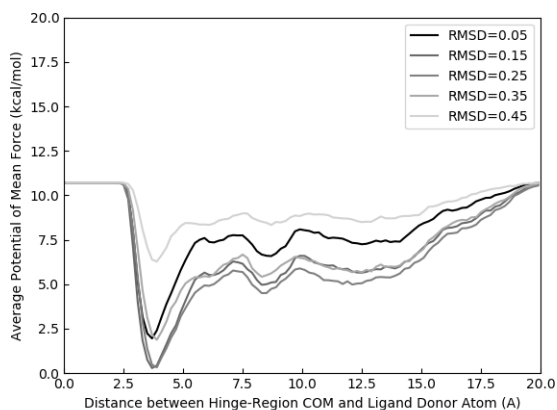

**Figure S3.4.** (a) PRT062607 structure (b) PMF curve of JH2/PRT062607 unbinding at 0.05 Å Val629 backbone RMSD (c) PMF curves of JH2/PRT062607 unbinding at highly-sampled Val629 backbone RMSDs. All PMF curves converged from 0 until at least 10 angstroms. Run 4 was excluded in the PMF curve average because there was not enough sampling at 0.05 Å Val629 backbone RMSD.

## PMF Curves of Jorgensen Lab-Developed JAK2 JH2 Ligands

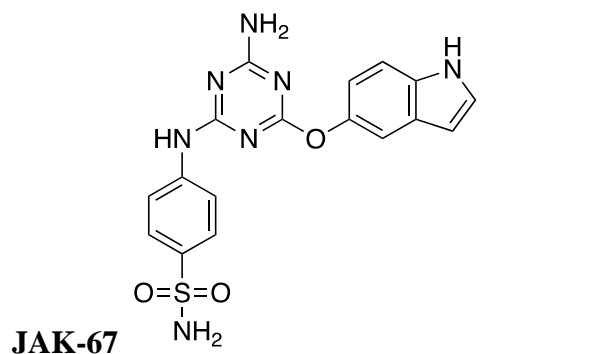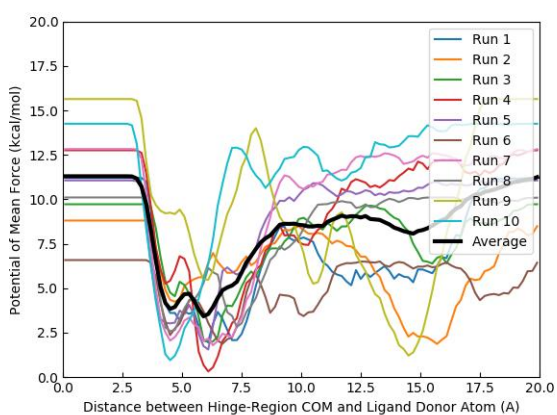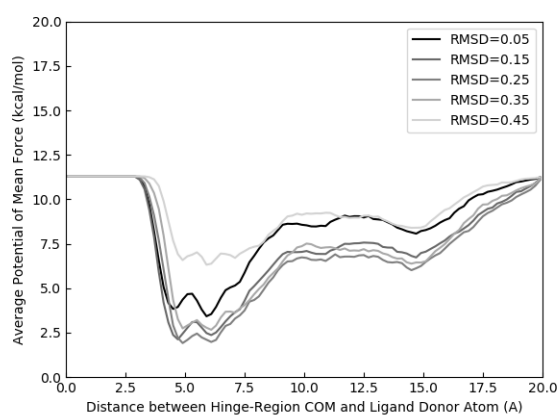

**Figure S4.1.** (a) JAK-67 structure (b) PMF curve of JH2/JAK-67 unbinding at 0.05 Å Val629 backbone RMSD (c) PMF curves of JH2/JAK-67 unbinding at highly-sampled Val629 backbone RMSDs. All PMF curves converged from 0 until at least 10 angstroms.

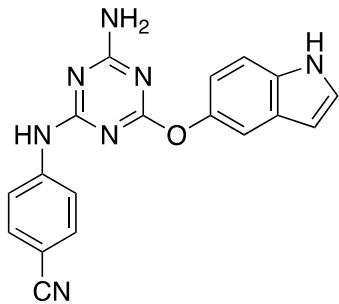

**JAK-82**

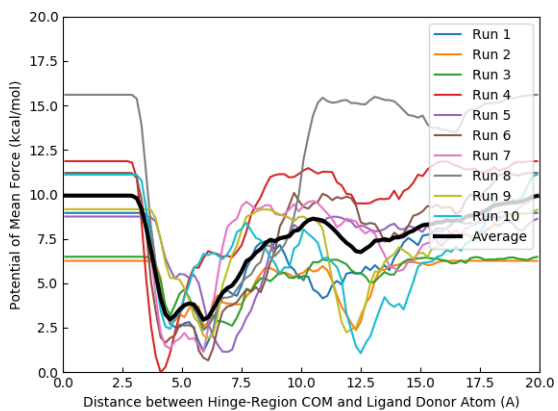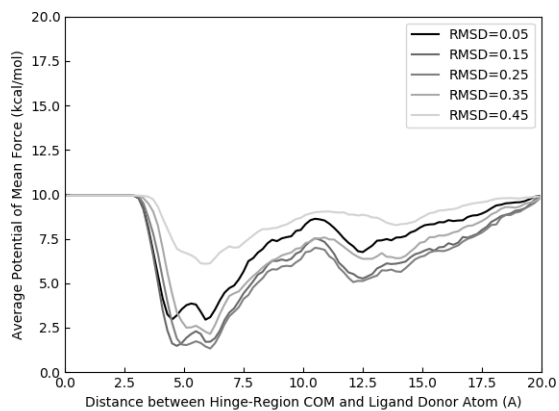

**Figure S4.2.** (a) JAK-82 structure (b) PMF curve of JH2-JAK82 unbinding at 0.05 Å Val629 backbone RMSD (c) PMF curves of JH2-JAK82 unbinding at highly-sampled Val629 backbone RMSDs. All PMF curves converged from 0 until at least 10 angstroms.

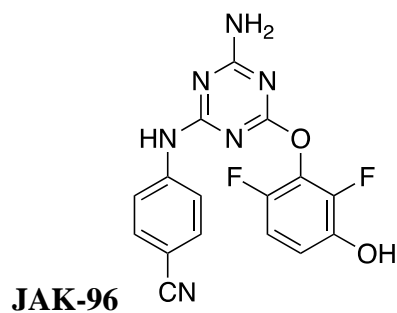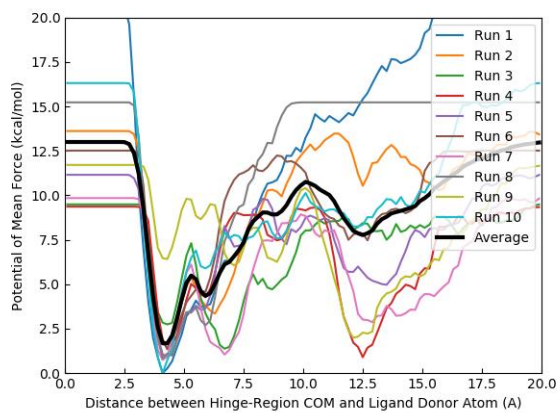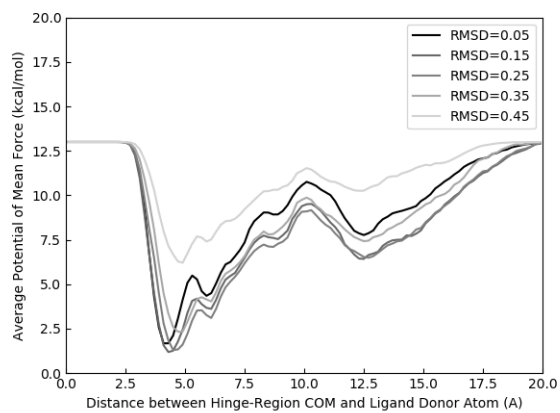

**Figure S4.3.** (a) JAK-96 structure (b) PMF curve of JH2-JAK96 unbinding at 0.05 Å Val629 backbone RMSD (c) PMF curves of JH2-JAK96 unbinding at highly-sampled Val629 backbone RMSDs. All PMF curves converged from 0 until at least 10 angstroms.

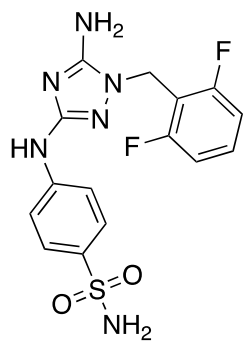

**JAK-118**

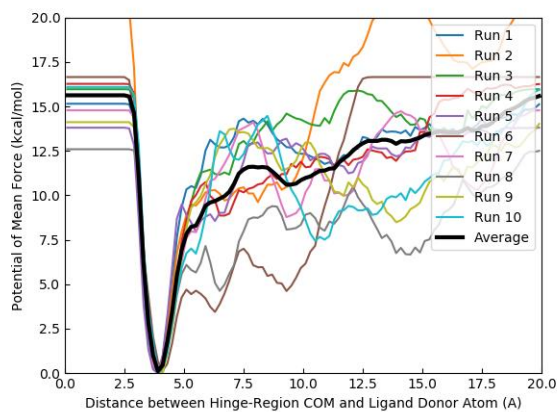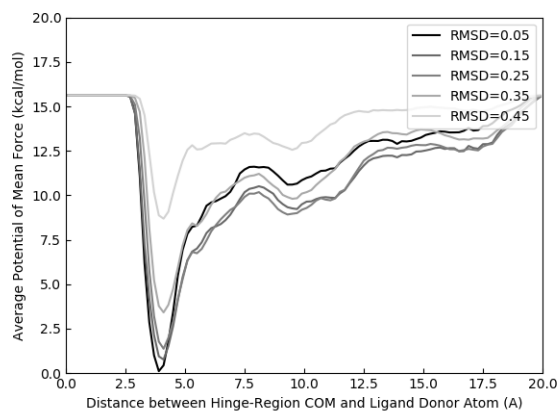

**Figure S4.4.** (a) JAK-118 structure (b) PMF curve of JH2/JAK-118 unbinding at 0.05 Å Val629 backbone RMSD (c) PMF curves of JH2/JAK-118 unbinding at highly-sampled Val629 backbone RMSDs. All PMF curves converged from 0 until at least 10 angstroms.

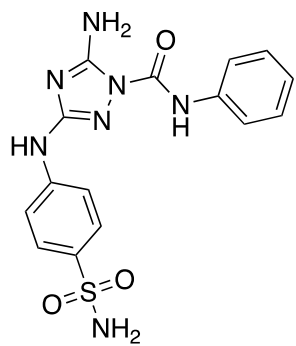

**JAK-170**

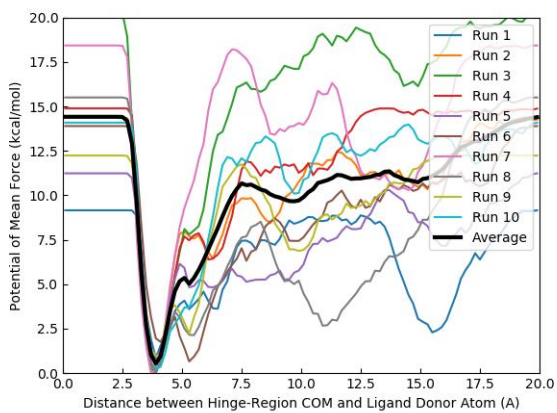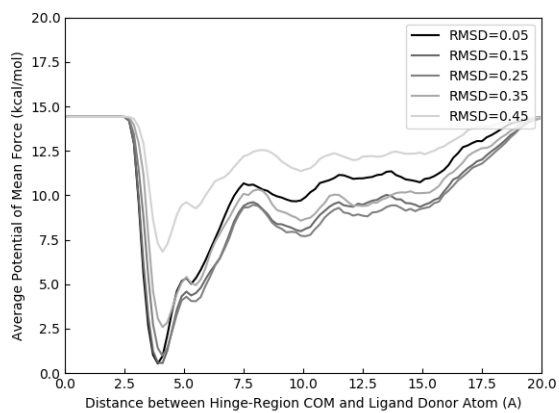

**Figure S4.5.** (a) JAK-170 structure (b) PMF curve of JH2/JAK-170 unbinding at 0.05 Å Val629 backbone RMSD (c) PMF curves of JH2/JAK-170 unbinding at highly-sampled Val629 backbone RMSDs. All PMF curves converged from 0 until at least 10 angstroms.

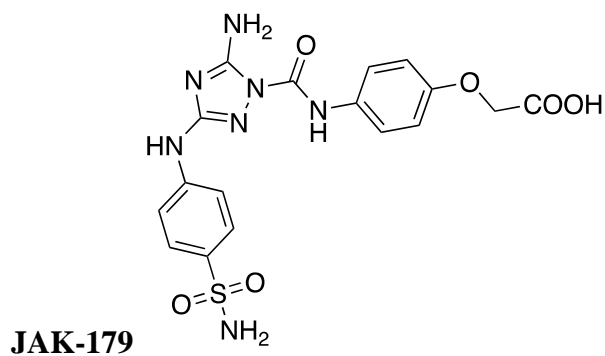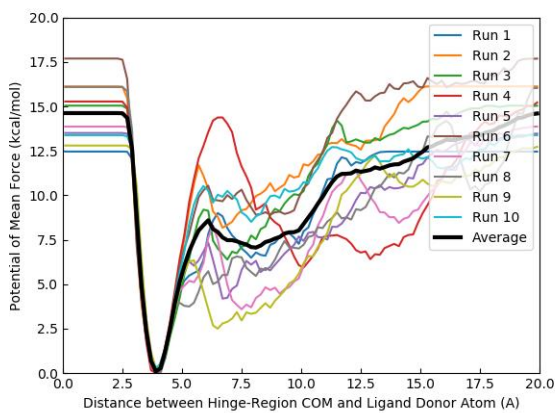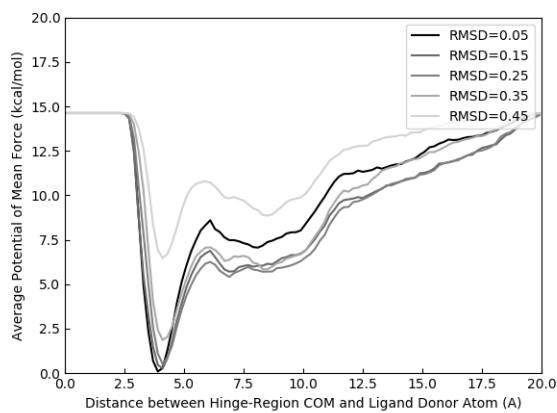

**Figure S4.6.** (a) JAK-179 structure (b) PMF curve of JH2/JAK-179 unbinding at 0.05 Å Val629 backbone RMSD (c) PMF curves of JH2-JAK179 unbinding at highly-sampled Val629 backbone RMSDs. All PMF curves converged from 0 until at least 10 angstroms.



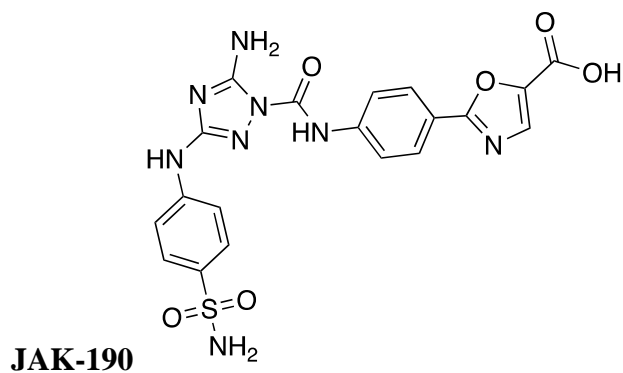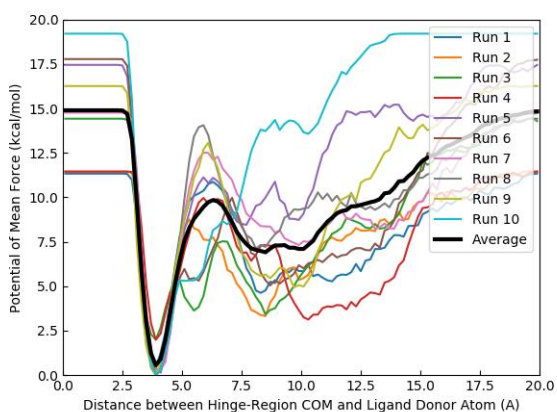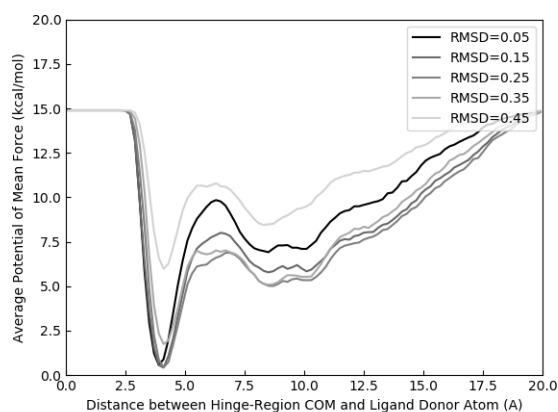

**Figure S4.7.** (a) JAK-190 structure (b) PMF curve of JH2-JAK190 unbinding at 0.05 Å Val629 backbone RMSD (c) PMF curves of JH2-JAK190 unbinding at highly-sampled Val629 backbone RMSDs. All PMF curves converged from 0 until at least 10 angstroms.

## PMF Curves of Crystal Structure (CS) Poses versus Higher SP-scoring Non-CS Poses

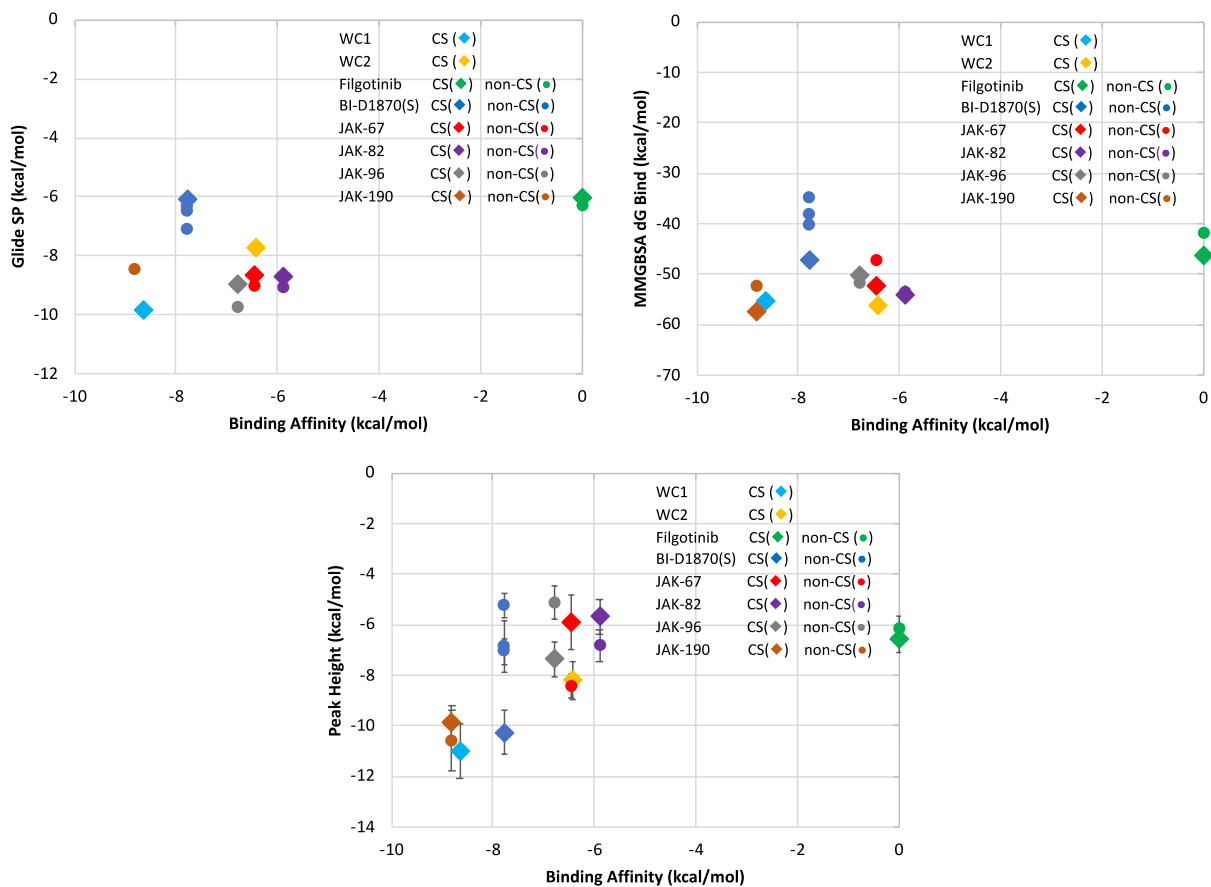

**Figure S5.1.** Comparison of the binding affinity of the ligand to the (a) Glide SP score, (b) MM/GBSA dG Bind and (c) peak height of the crystal structure and higher-ranked poses.

**BI-D1870 (S)**

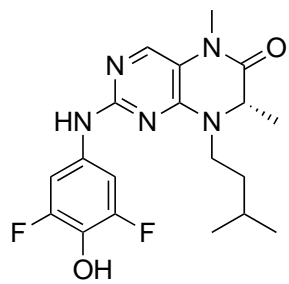

**Top Glide SP pose**

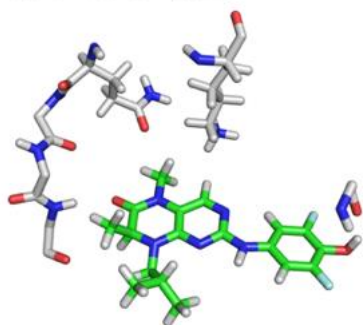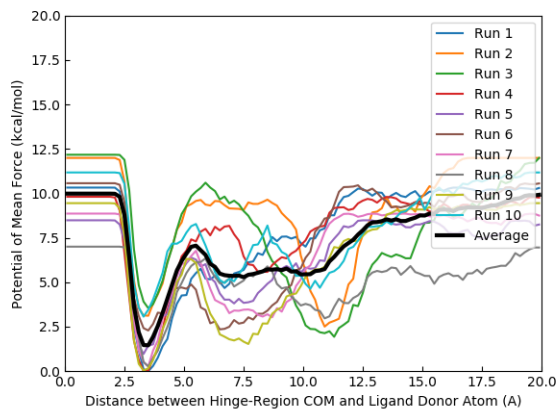

**Second Glide SP pose**

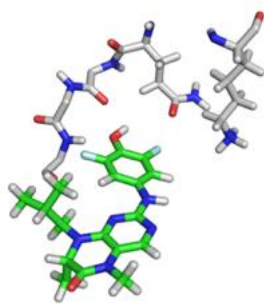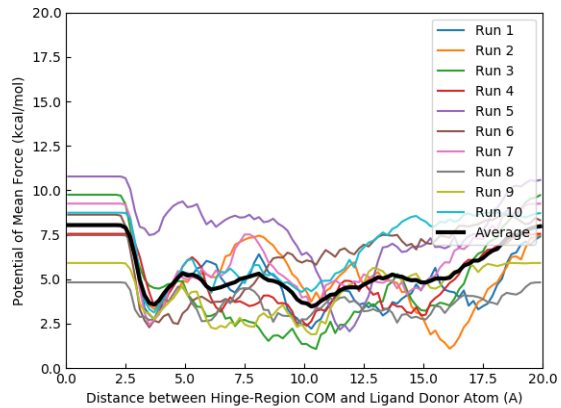

### Third Glide SP pose

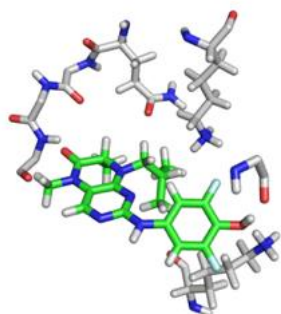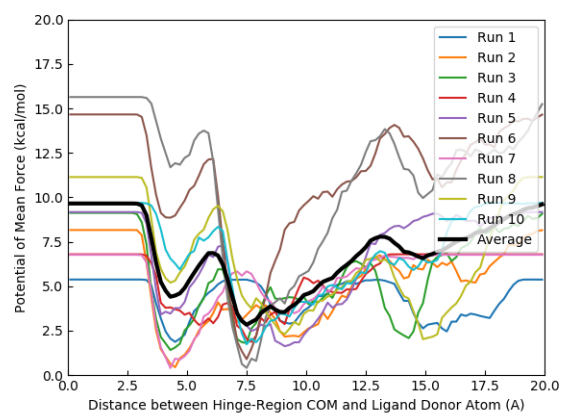

### CS Glide SP pose

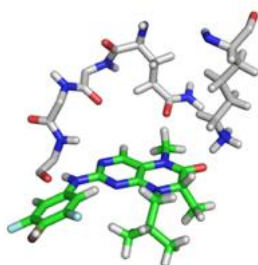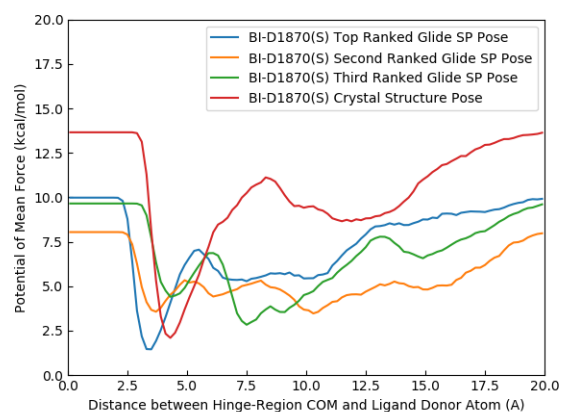

**Figure S5.2.** (a) BI-D1870(S) structure (b-d) For each higher-ranking Glide SP pose, [(I) JH2/BI-D1870(S) Glide SP pose (II) PMF curve of JH2-BI-D1870(S) unbinding at 0.05 Å Val629 backbone RMSD]. (e) BI-D1870(S) crystal structure pose (f) Comparison of average PMF curves of crystal structure pose and higher-ranking Glide SP poses for BI-D1870(S). All PMF curves converged from 0 until at least 10 angstroms.

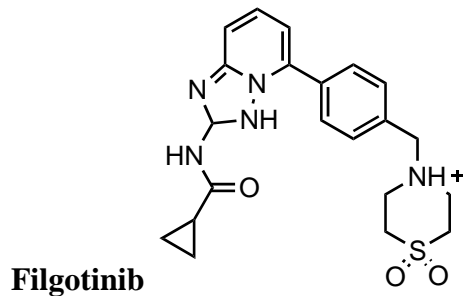

**Top Glide SP pose**

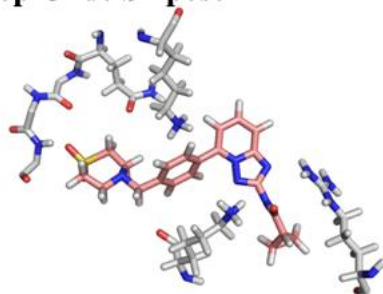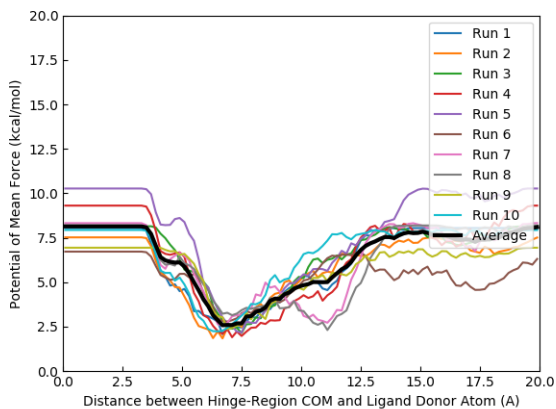

**CS Glide SP pose**

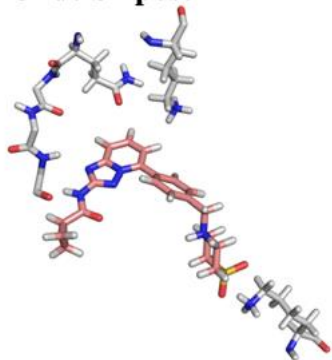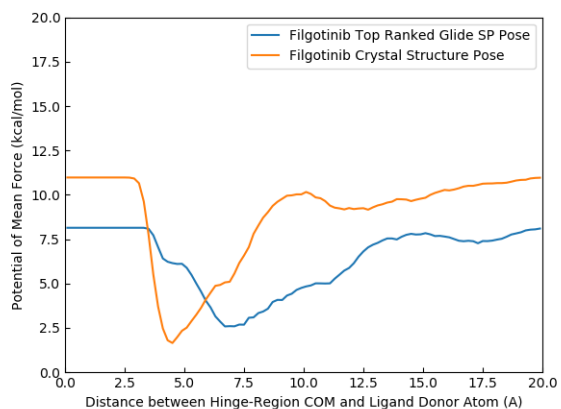

**Figure S5.3.** (a) Filgotinib structure (b) JH2/Filgotinib top Glide SP pose (c) PMF curve of JH2/Filgotinib (top pose) unbinding at 0.05 Å Val629 backbone RMSD (d) JH2/Filgotinib crystal structure pose (e) Comparison of average PMF curves of crystal structure pose and top Glide SP pose for Filgotinib. All PMF curves converged from 0 until at least 10 angstroms.

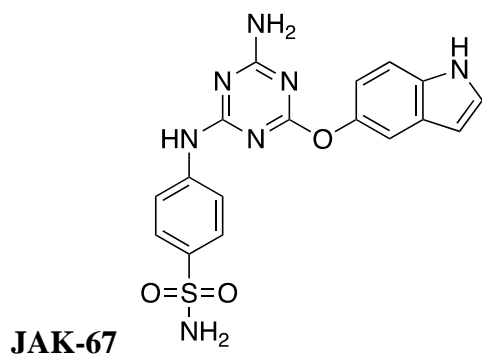

**Top Glide SP pose**

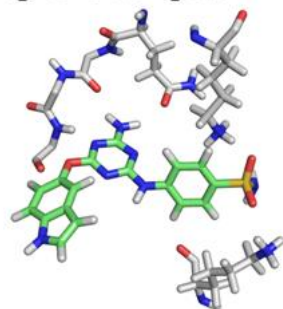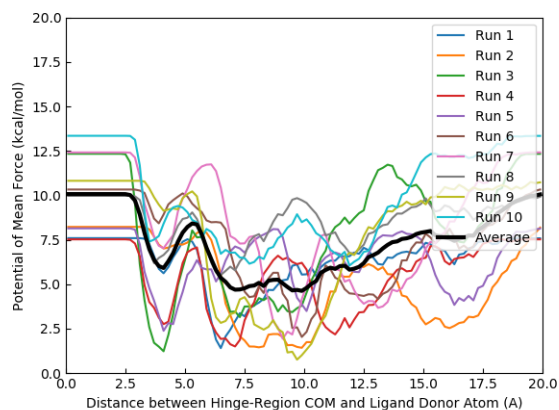

**CS Glide SP pose**

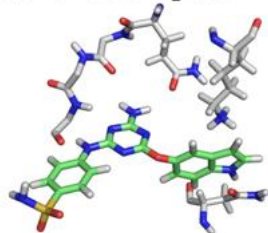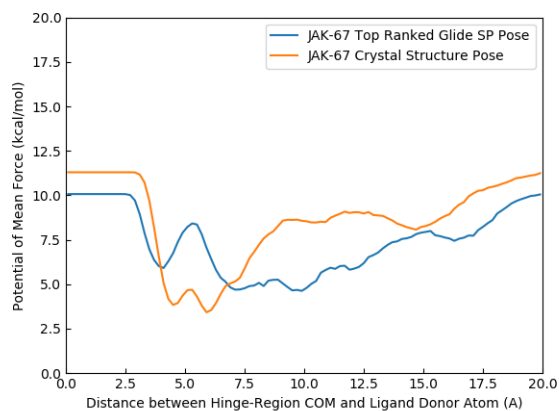

**Figure S5.4.** (a) JAK-67 structure (b) JH2/JAK-67 top Glide SP pose (c) PMF curve of JH2/JAK-67 (top pose) unbinding at 0.05 Å Val629 backbone RMSD (d) JH2/JAK-67 crystal structure pose (e) Comparison of average PMF curves of crystal structure pose and top Glide SP pose for JAK-67. All PMF curves converged from 0 until at least 10 angstroms.

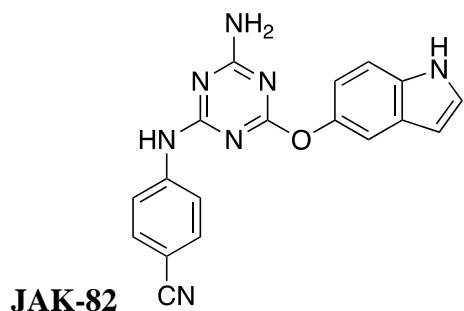

**Top Glide SP pose**

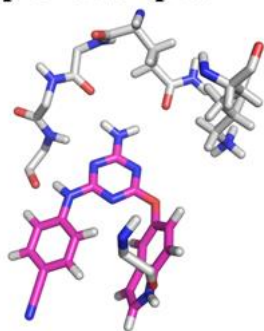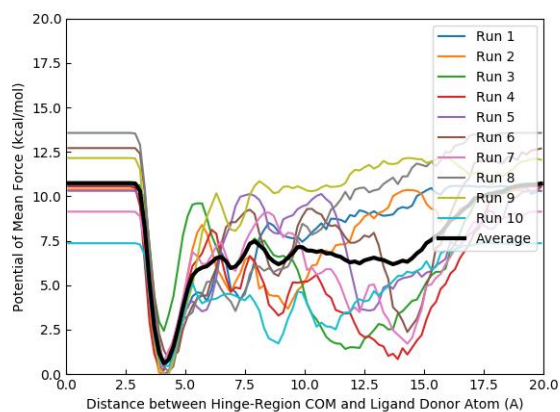

**CS Glide SP pose**

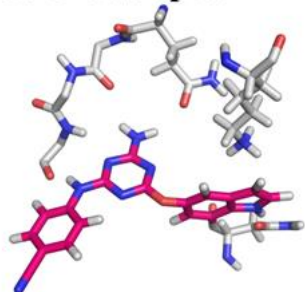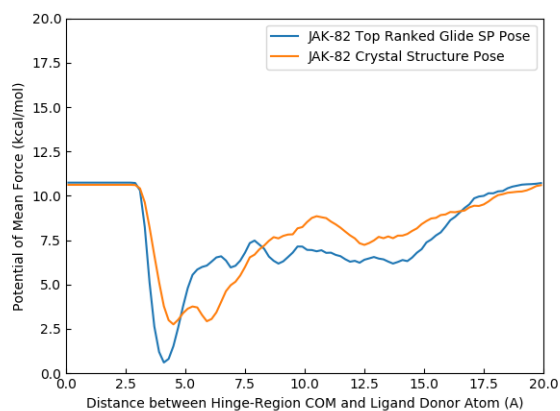

**Figure S5.5.** (a) JAK-82 structure (b) JH2/JAK-82 top Glide SP pose (c) PMF curve of JH2/JAK-82 (top pose) unbinding at 0.05 Å Val629 backbone RMSD (d) JH2/JAK-82 crystal structure pose based on JH2/JAK-67 crystal structure (e) Comparison of average PMF curves of crystal structure pose and top Glide SP pose for JAK-82. All PMF curves converged from 0 until at least 10 angstroms.

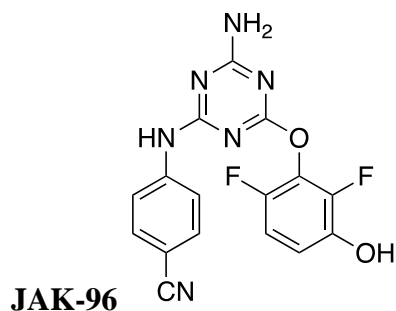

**Top Glide SP pose**

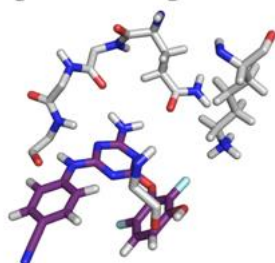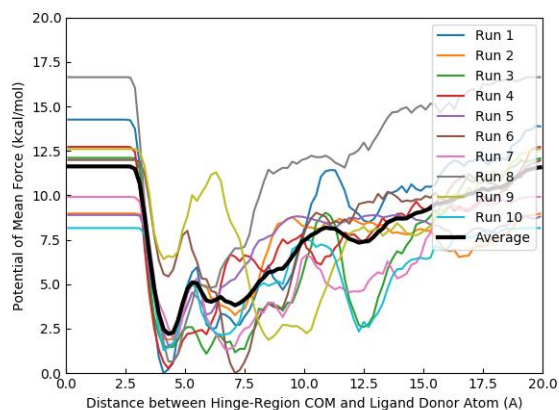

**CS Glide SP pose**

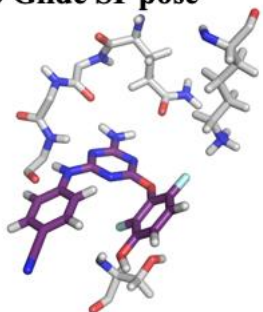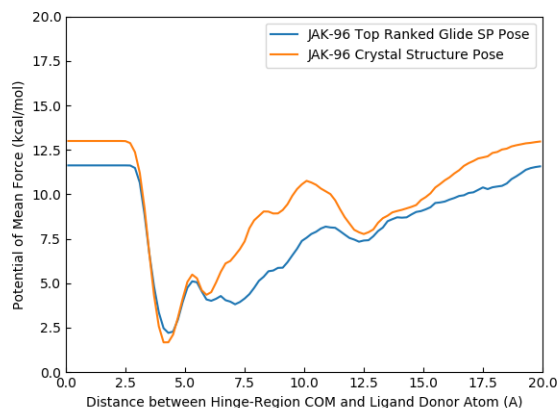

**Figure S5.6.** (a) JAK-96 structure (b) JH2/JAK-96 top Glide SP pose (c) PMF curve of JH2/JAK-96 (top pose) unbinding at 0.05 Å Val29 backbone RMSD (d) JH2/JAK-96 crystal structure pose (e) Comparison of average PMF curves of crystal structure pose and top Glide SP pose for JAK-96. All PMF curves converged from 0 until at least 10 angstroms.



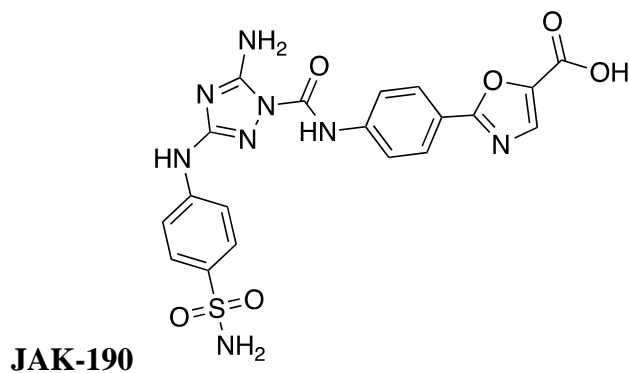

**Top Glide SP pose**

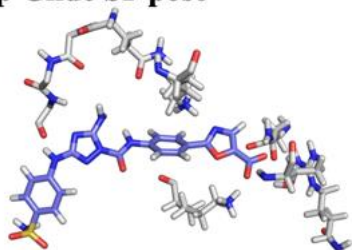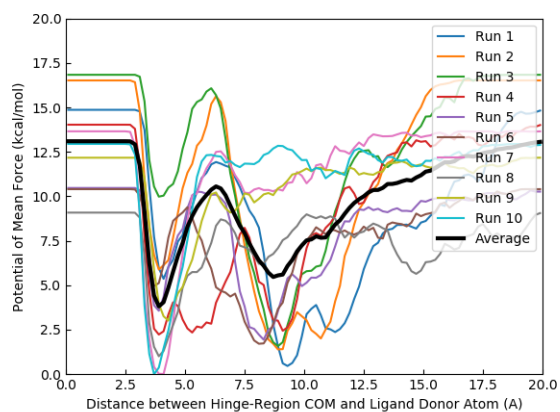

**CS Glide SP pose**

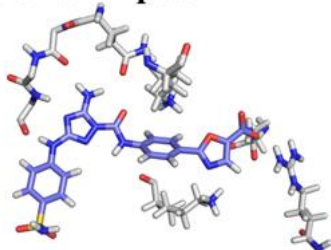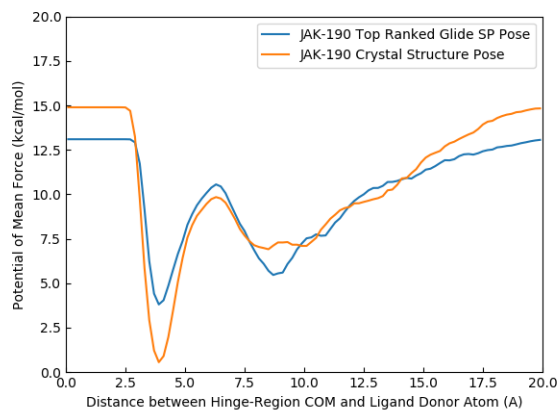

**Figure S5.7.** (a) JAK-190 structure (b) JH2/JAK-190 top Glide SP pose (c) PMF curve of JH2/JAK-190 (top pose) unbinding at 0.05 Å Val629 backbone RMSD (d) JH2/JAK-190 crystal structure pose (e) Comparison of average PMF curves of crystal structure pose and top Glide SP pose for JAK-190. All PMF curves converged from 0 until at least 10 angstroms.

## PMF Curves of Virtual Screening Ligands

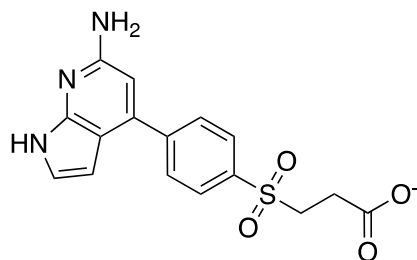

**JAK-198**

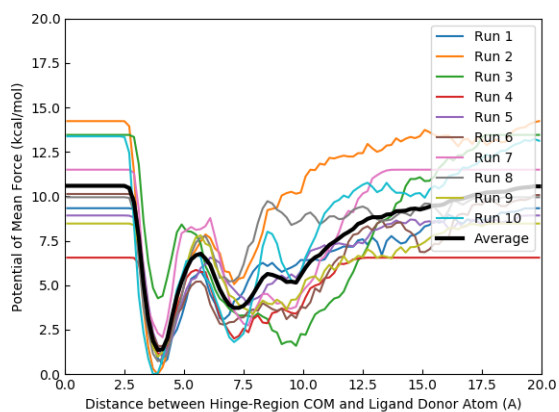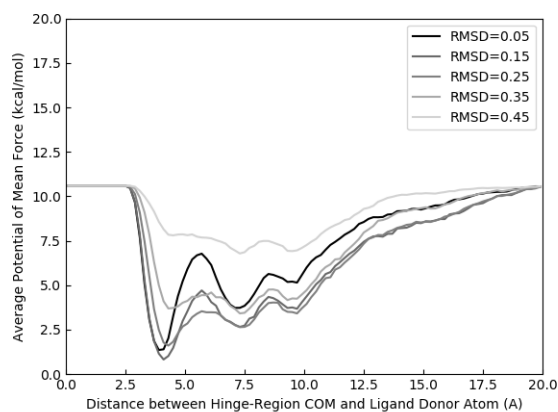

**Figure S6.1.** (a) JAK-198 structure (b) PMF curve of JH2/JAK-198 unbinding at 0.05 Å Val629 backbone RMSD (c) PMF curves of JH2/JAK-198 unbinding at highly-sampled Val629 backbone RMSDs. All PMF curves converged from 0 until at least 10 angstroms.

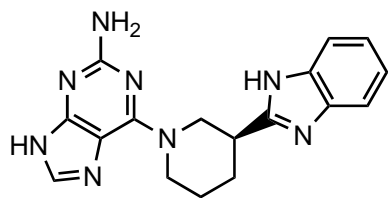

**JAK-199**

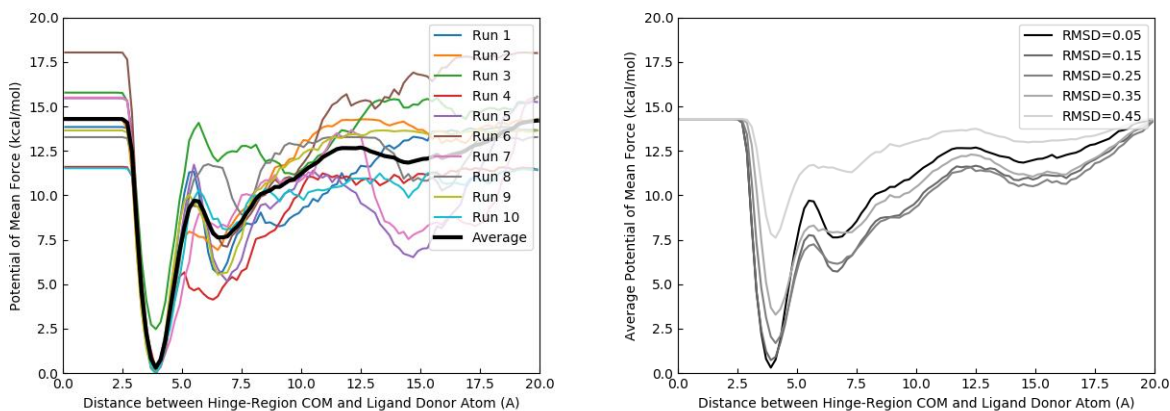

**Figure S6.2.** (a) JAK-199 structure (b) PMF curve of JH2/JAK-199 unbinding at 0.05 Å Val629 backbone RMSD (c) PMF curves of JH2/JAK-199 unbinding at highly-sampled Val629 backbone RMSDs. All PMF curves converged from 0 until at least 10 angstroms.

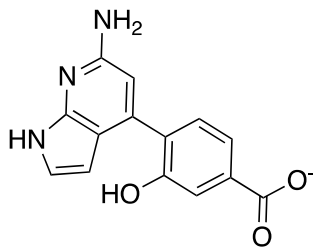

**JAK-200**

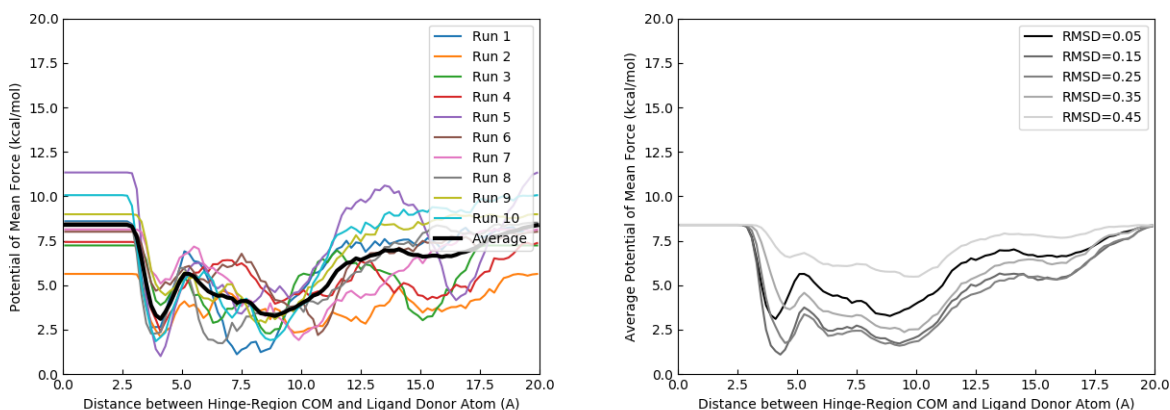

**Figure S6.3.** (a) JAK-200 structure (b) PMF curve of JH2-JAK200 unbinding at 0.05 Å Val629 backbone RMSD (c) PMF curves of JH2/JAK-200 unbinding at highly-sampled Val629 backbone RMSDs. All PMF curves converged from 0 until at least 10 angstroms.

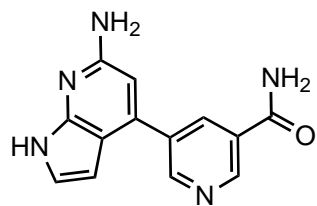

**JAK-201**

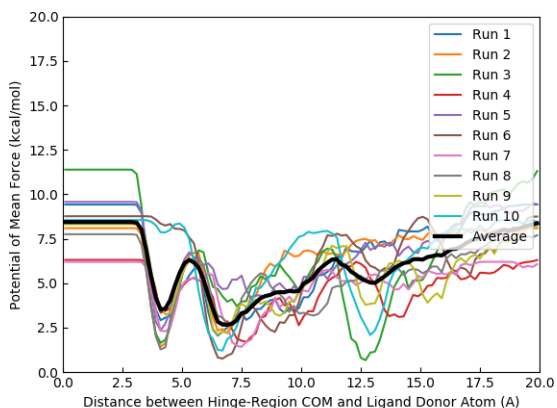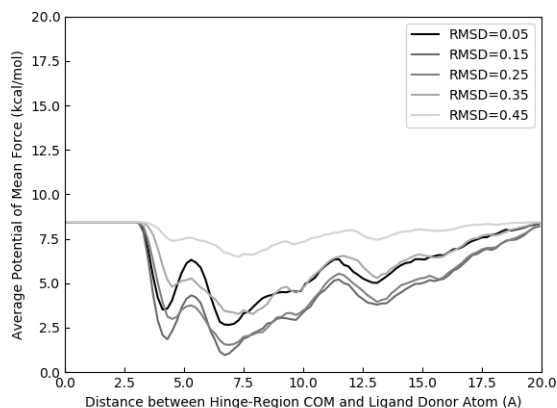

**Figure S6.4.** (a) JAK-201 structure (b) PMF curve of JH2/JAK-201 unbinding at 0.05 Å Val629 backbone RMSD (c) PMF curves of JH2/JAK-201 unbinding at highly-sampled Val629 backbone RMSDs. All PMF curves converged from 0 until at least 10 angstroms.

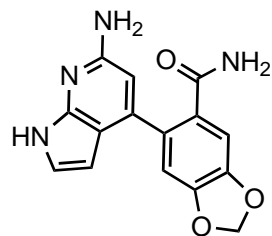

**JAK-202**

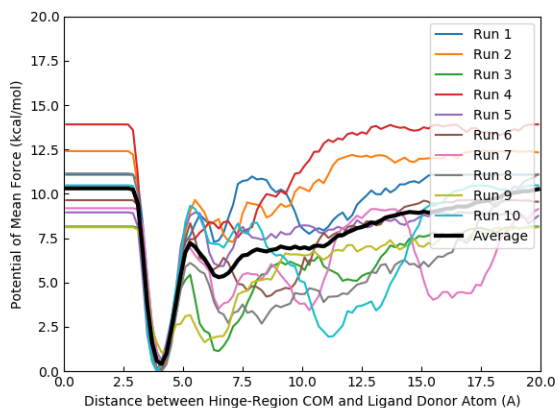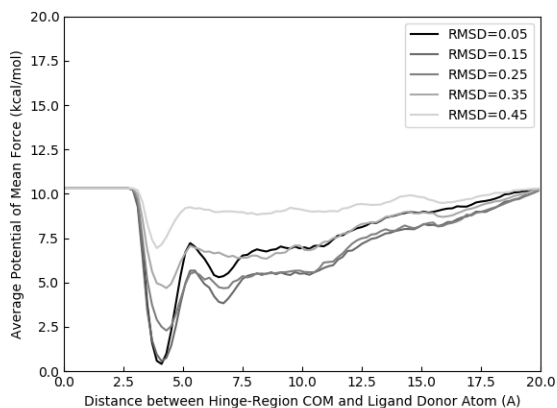

**Figure S6.5.** (a) JAK-202 structure (b) PMF curve of JH2/JAK-202 unbinding at 0.05 Å Val629 backbone RMSD (c) PMF curves of JH2/JAK-202 unbinding at highly-sampled Val629 backbone RMSDs. All PMF curves converged from 0 until at least 10 angstroms.

**JAK-203**

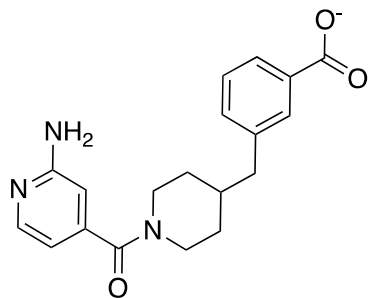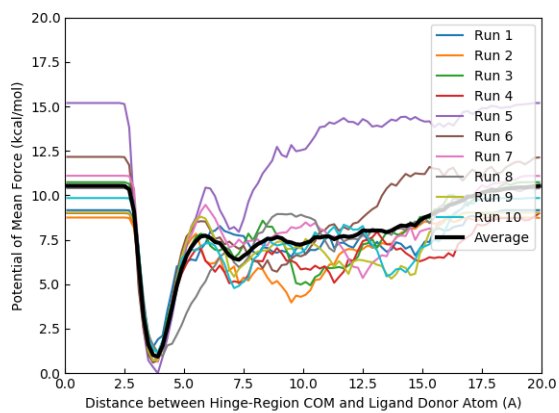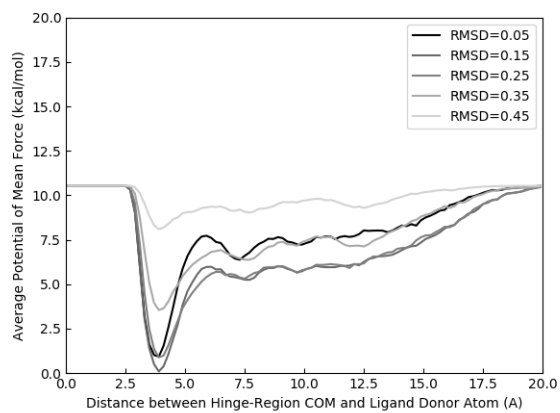

**Figure S6.6.** (a) JAK-203 structure (b) PMF curve of JH2/JAK-203 unbinding at 0.05 Å Val629 backbone RMSD (c) PMF curves of JH2/JAK-203 unbinding at highly-sampled Val629 backbone RMSDs. All PMF curves converged from 0 until at least 10 angstroms.

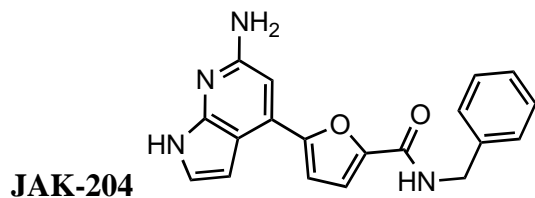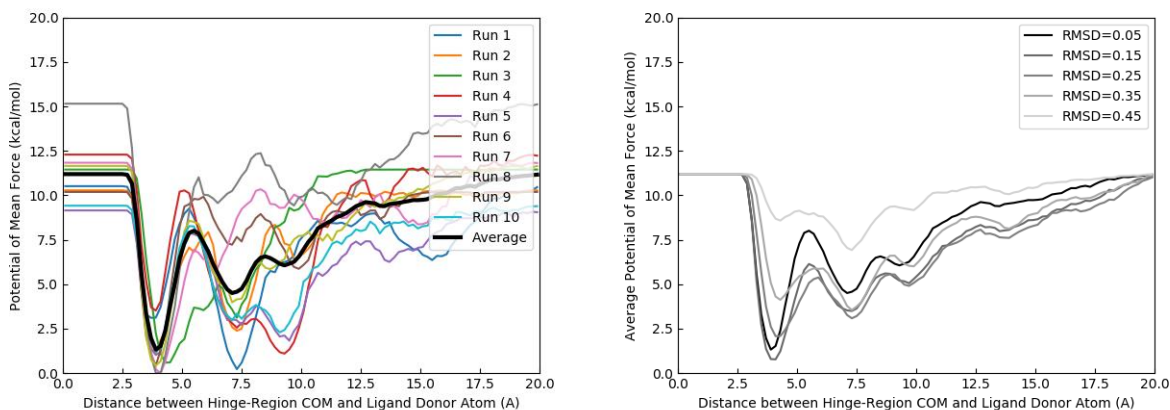

**Figure S6.7.** (a) JAK-204 structure (b) PMF curve of JH2/JAK-204 unbinding at 0.05 Å Val629 backbone RMSD (c) PMF curves of JH2/JAK-204 unbinding at highly-sampled Val629 backbone RMSDs. All PMF curves converged from 0 until at least 10 angstroms.

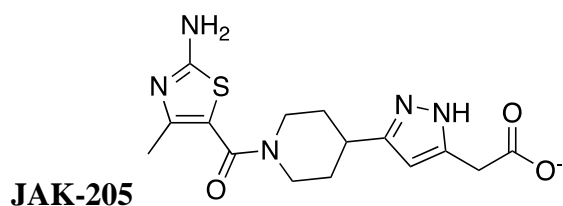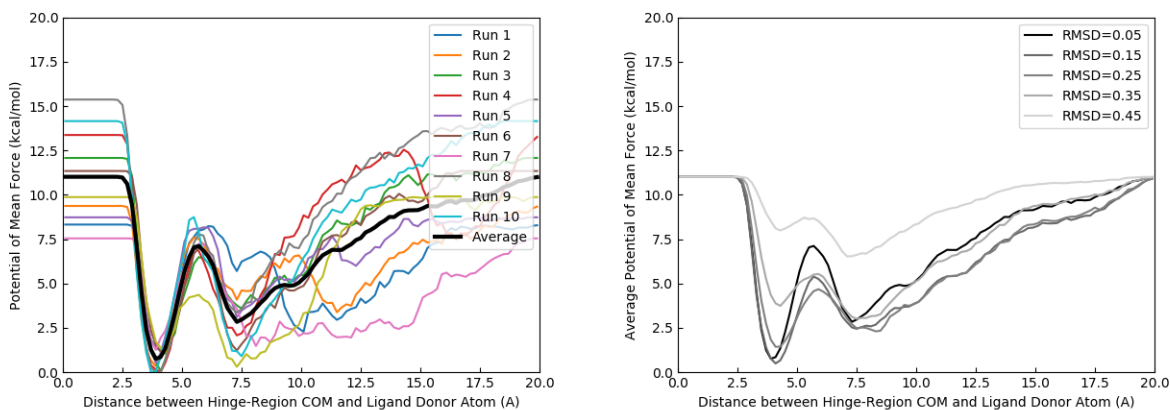

**Figure S6.8.** (a) JAK-205 structure (b) PMF curve of JH2/JAK-205 unbinding at 0.05 Å Val629 backbone RMSD (c) PMF curves of JH2/JAK-205 unbinding at highly-sampled Val629 backbone RMSDs. All PMF curves converged from 0 until at least 10 angstroms.

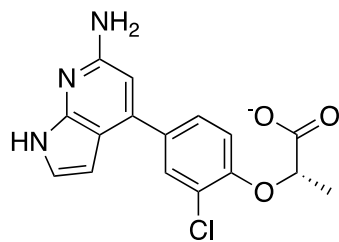

**JAK-206**

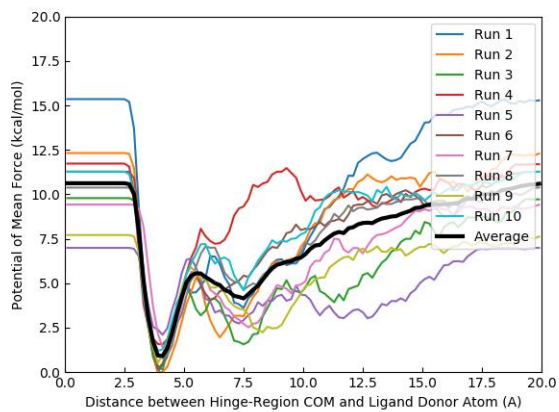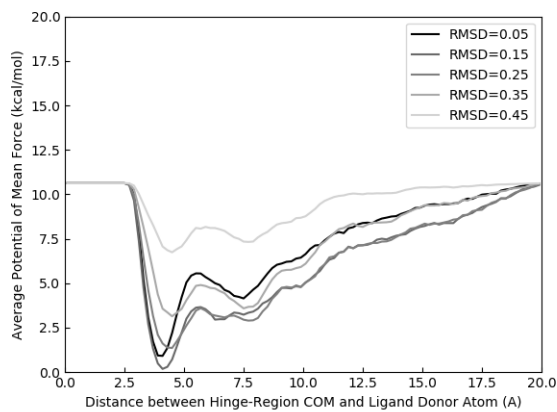

**Figure S6.9.** (a) JAK-206 structure (b) PMF curve of JH2/JAK-206 unbinding at 0.05 Å Val629 backbone RMSD (c) PMF curves of JH2/JAK-206 unbinding at highly-sampled Val629 backbone RMSDs. All PMF curves converged from 0 until at least 10 angstroms.

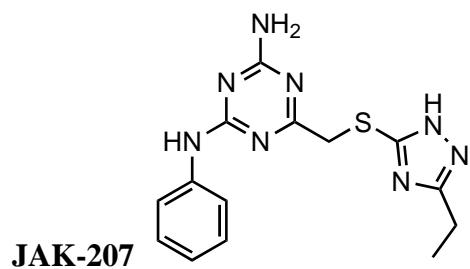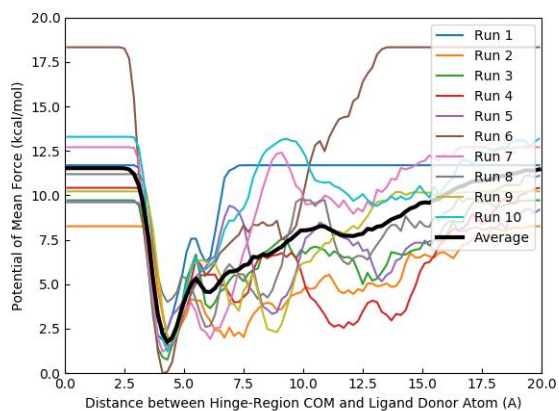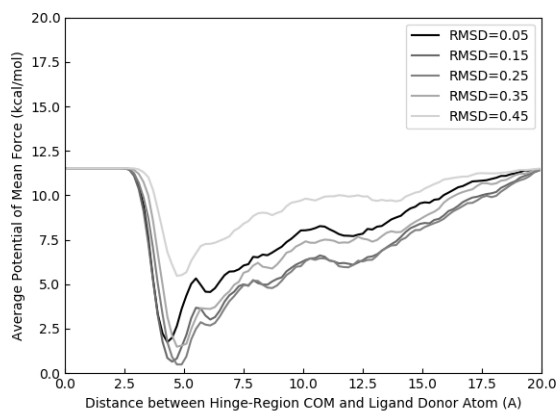

**Figure S6.10.** (a) JAK-207 structure (b) PMF curve of JH2/JAK-207 unbinding at 0.05 Å Val629 backbone RMSD (c) PMF curves of JH2/JAK-207 unbinding at highly-sampled Val629 backbone RMSDs. All PMF curves converged from 0 until at least 10 angstroms. Run 1 was excluded in the PMF curve average because there was not enough sampling at 0.05 Å Val629 backbone RMSD.



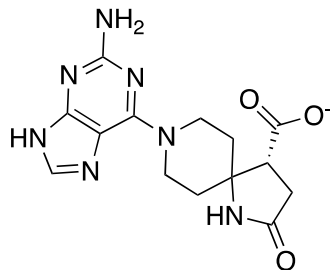

**JAK-208**

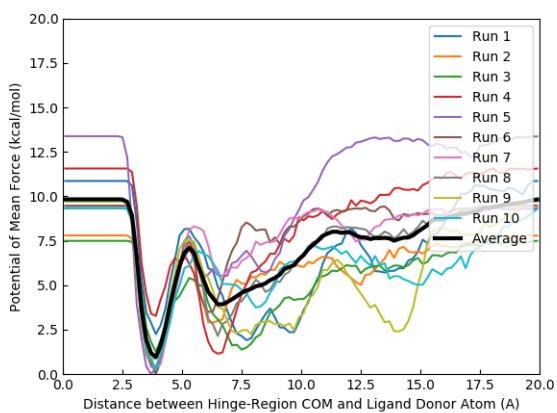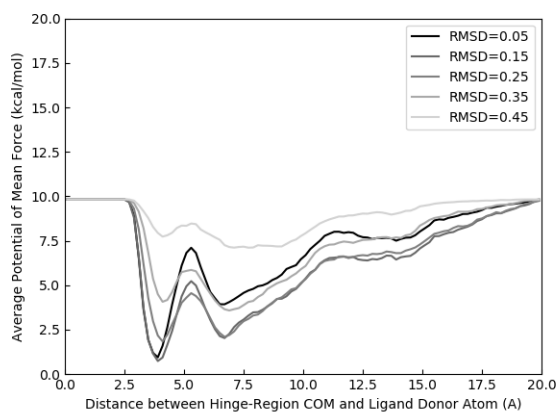

**Figure S6.11.** (a) JAK-208 structure (b) PMF curve of JH2/JAK-208 unbinding at 0.05 Å Val629 backbone RMSD (c) PMF curves of JH2/JAK-208 unbinding at highly-sampled Val629 backbone RMSDs. All PMF curves converged from 0 until at least 10 angstroms.

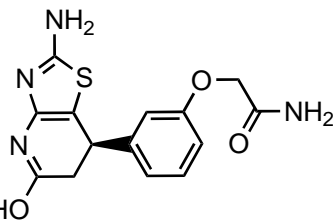

**JAK-209**

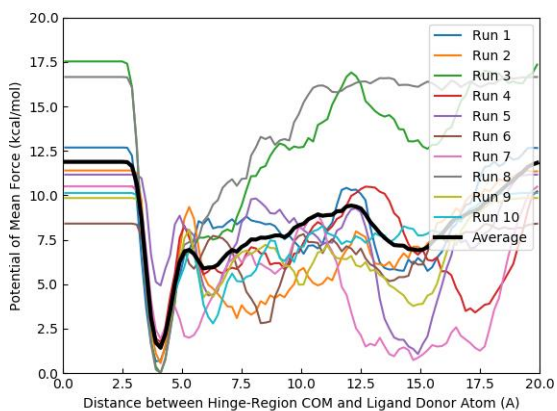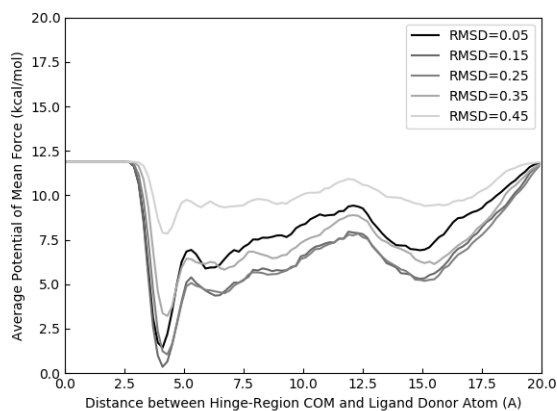

**Figure S6.12.** (a) JAK-209 structure (b) PMF curve of JH2/JAK-209 unbinding at 0.05 Å Val629 backbone RMSD (c) PMF curves of JH2/JAK-209 unbinding at highly-sampled Val629 backbone RMSDs. All PMF curves converged from 0 until at least 10 angstroms.

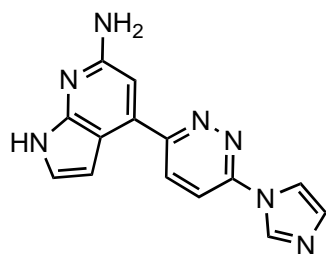

**JAK-210**

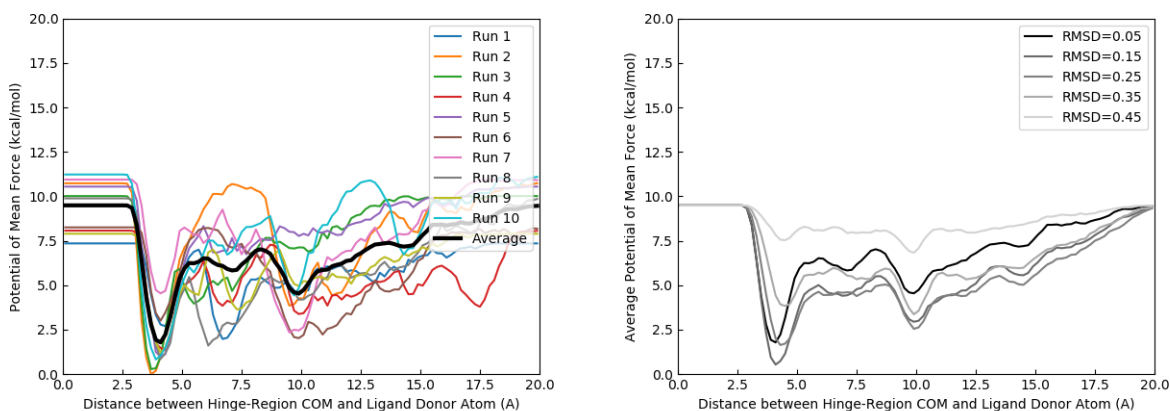

**Figure S6.13.** (a) JAK-210 structure (b) PMF curve of JH2/JAK-210 unbinding at 0.05 Å Val629 backbone RMSD (c) PMF curves of JH2/JAK-210 unbinding at highly-sampled Val629 backbone RMSDs. All PMF curves converged from 0 until at least 10 angstroms.

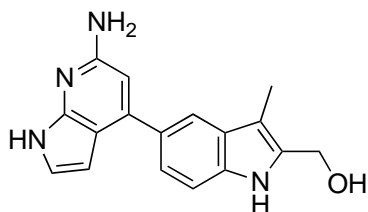

**JAK-211**

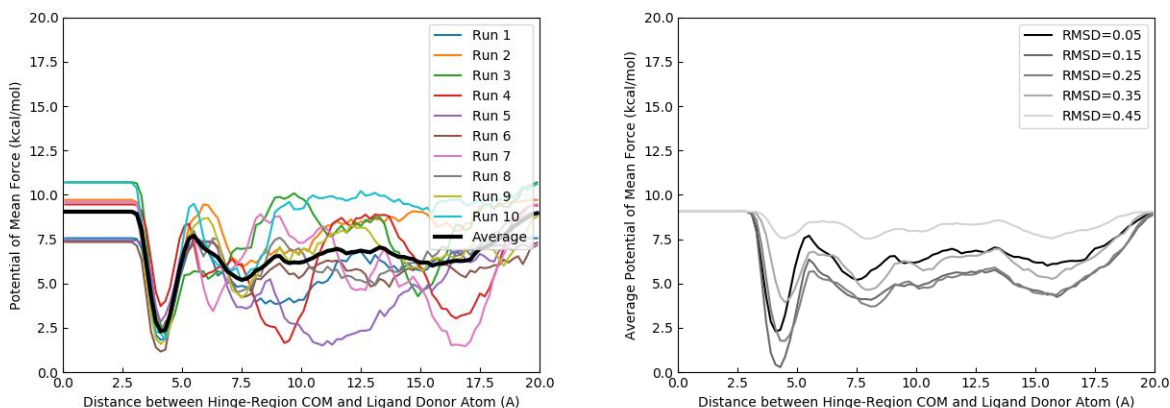

**Figure S6.14.** (a) JAK-211 structure (b) PMF curve of JH2/JAK-211 unbinding at 0.05 Å Val629 backbone RMSD (c) PMF curves of JH2/JAK-211 unbinding at highly-sampled Val629 backbone RMSDs. All PMF curves converged from 0 until at least 10 angstroms.

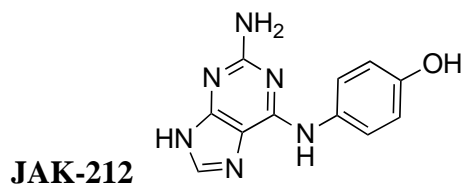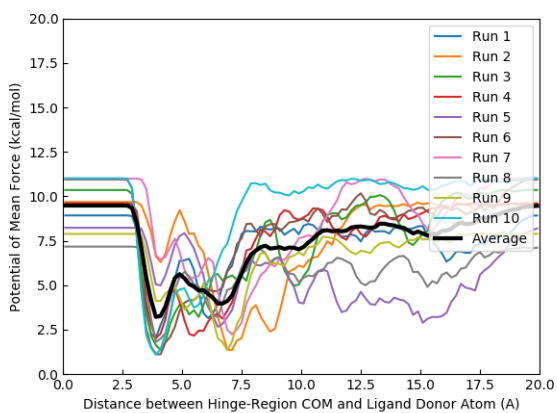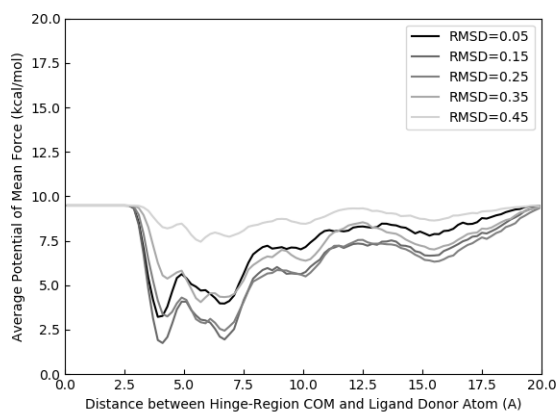

**Figure S6.15.** (a) JAK-212 structure (b) PMF curve of JH2/JAK-212 unbinding at 0.05 Å Val629 backbone RMSD (c) PMF curves of JH2/JAK-212 unbinding at highly-sampled Val629 backbone RMSDs. All PMF curves converged from 0 until at least 10 angstroms.

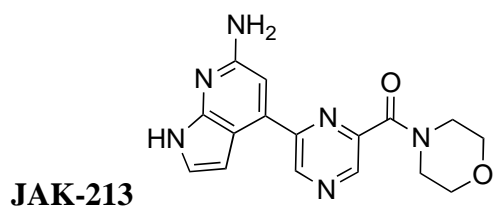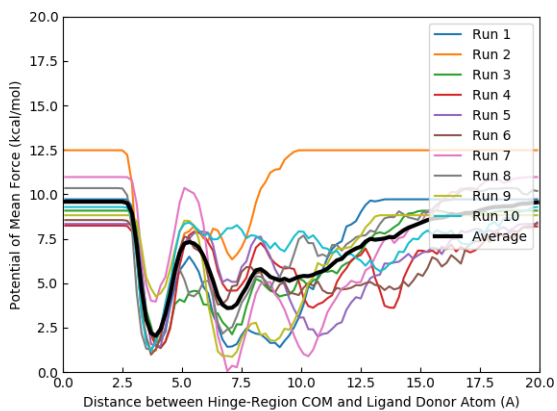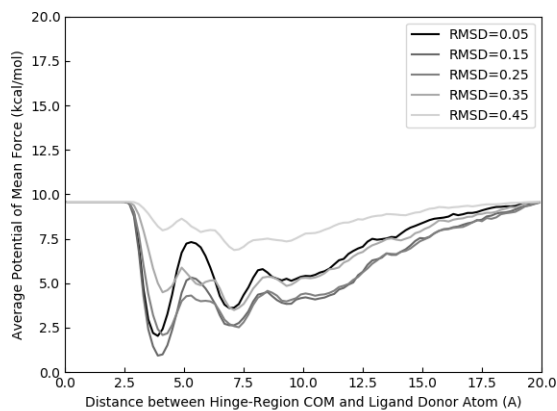

**Figure S6.16.** (a) JAK-213 structure (b) PMF curve of JH2/JAK-213 unbinding at 0.05 Å Val629 backbone RMSD (c) PMF curves of JH2/JAK-213 unbinding at highly-sampled Val629 backbone RMSDs. All PMF curves converged from 0 until at least 10 angstroms.

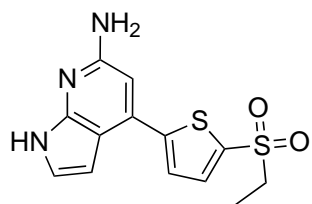

**JAK-214**

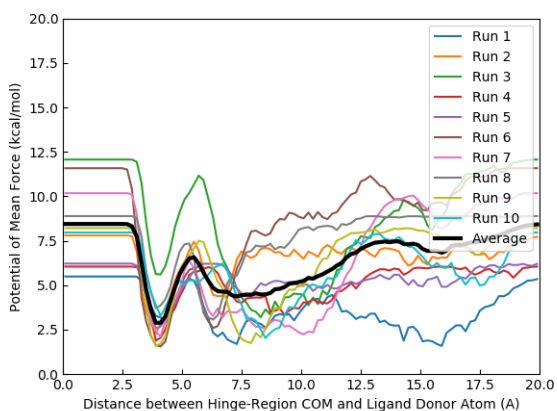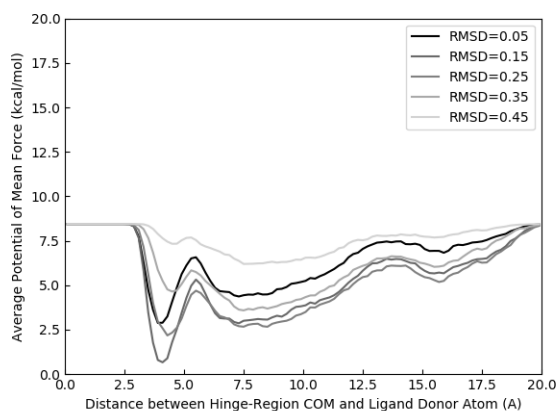

**Figure S6.17.** (a) JAK-214 structure (b) PMF curve of JH2/JAK-214 unbinding at 0.05 Å Val629 backbone RMSD (c) PMF curves of JH2/JAK-214 unbinding at highly-sampled Val629 backbone RMSDs. All PMF curves converged from 0 until at least 10 angstroms.

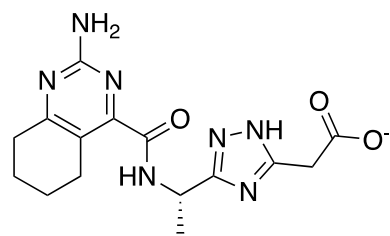

**JAK-215**

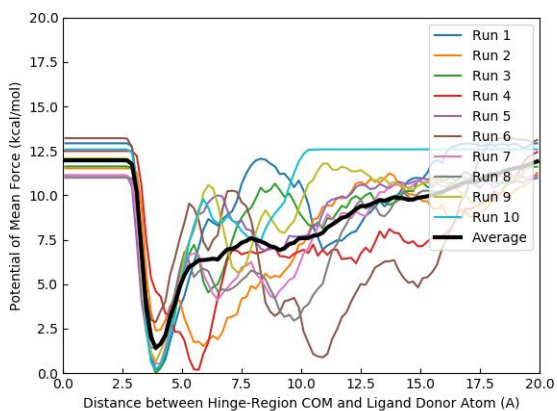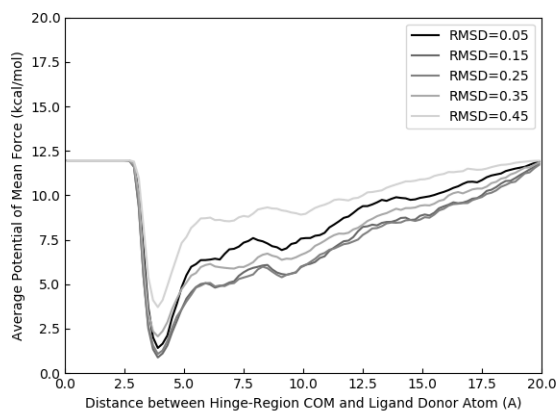

**Figure S6.18.** (a) JAK-215 structure (b) PMF curve of JH2/JAK-215 unbinding at 0.05 Å Val629 backbone RMSD (c) PMF curves of JH2/JAK-215 unbinding at highly-sampled Val629 backbone RMSDs. All PMF curves converged from 0 until at least 10 angstroms.

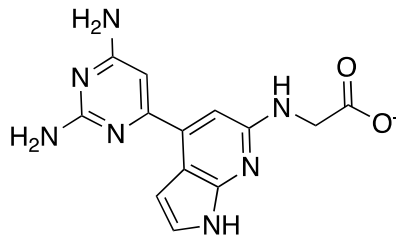

**JAK-216**

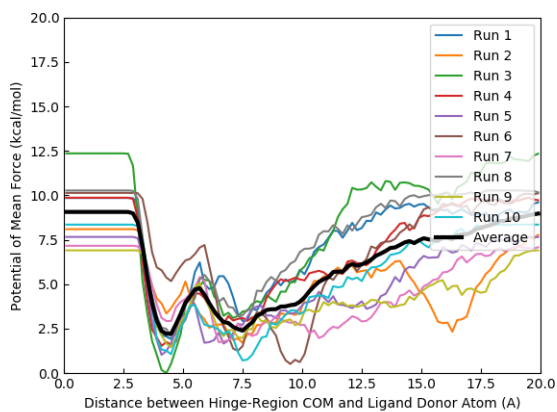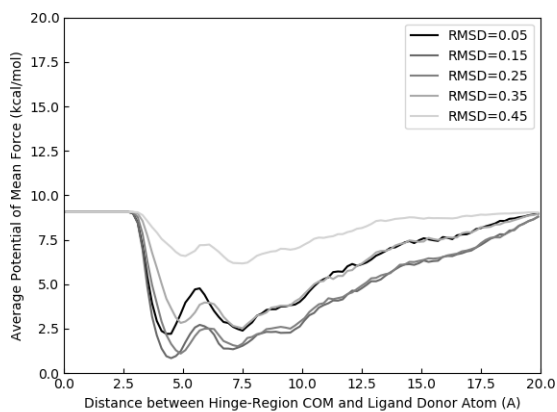

**Figure S6.19.** (a) JAK-216 structure (b) PMF curve of JH2/JAK-216 unbinding at 0.05 Å Val629 backbone RMSD (c) PMF curves of JH2/JAK-216 unbinding at highly-sampled Val629 backbone RMSDs. All PMF curves converged from 0 until at least 10 angstroms.

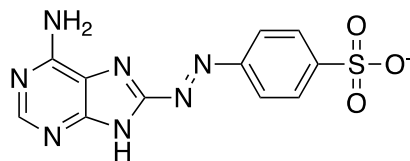

**JAK-217**

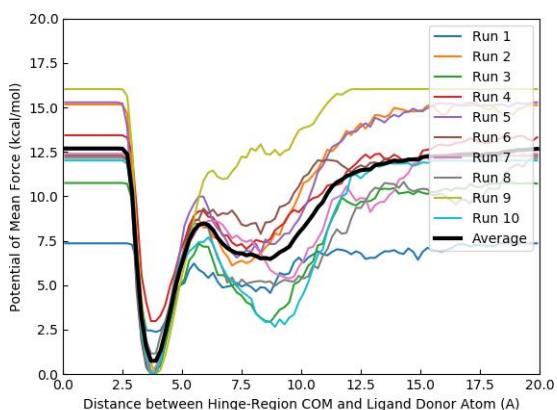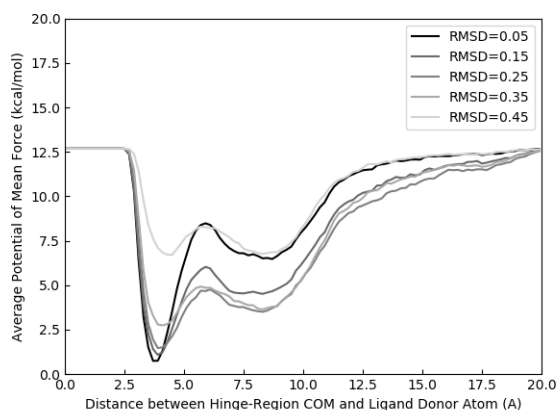

**Figure S6.20.** (a) JAK-217 structure (b) PMF curve of JH2/JAK-217 unbinding at 0.05 Å Val629 backbone RMSD (c) PMF curves of JH2/JAK-217 unbinding at highly-sampled Val629 backbone RMSDs. All PMF curves converged from 0 until at least 10 angstroms.

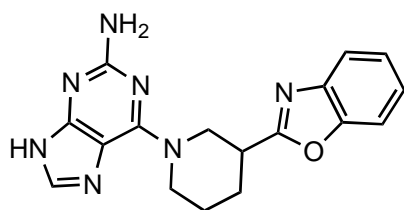

**JAK-218**

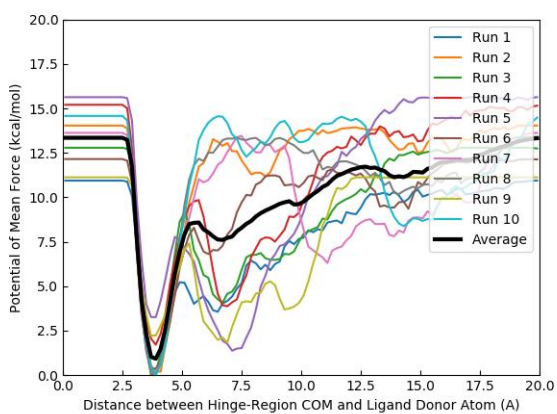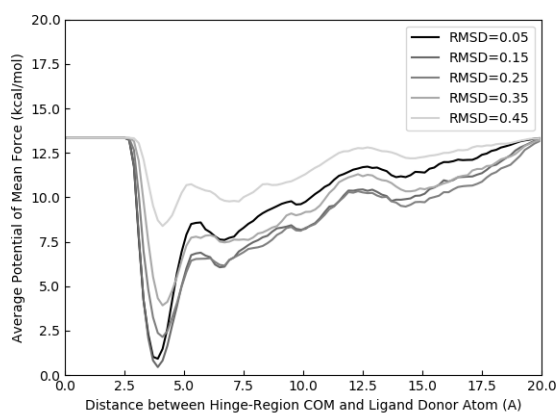

**Figure S6.21.** (a) JAK-218 structure (b) PMF curve of JH2/JAK-218 unbinding at 0.05 Å Val629 backbone RMSD (c) PMF curves of JH2/JAK-218 unbinding at highly-sampled Val629 backbone RMSDs. All PMF curves converged from 0 until at least 10 angstroms.

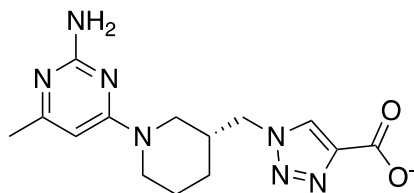

**JAK-219**

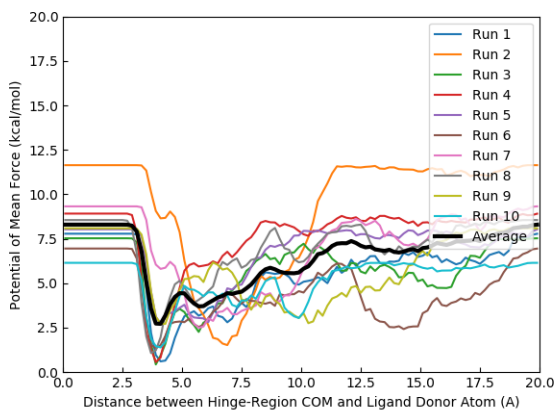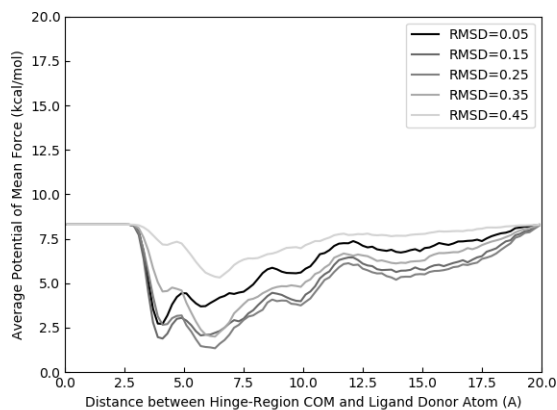

**Figure S6.22.** (a) JAK-219 structure (b) PMF curve of JH2/JAK-219 unbinding at 0.05 Å Val629 backbone RMSD (c) PMF curves of JH2/JAK-219 unbinding at highly-sampled Val629 backbone RMSDs. All PMF curves converged from 0 until at least 10 angstroms.

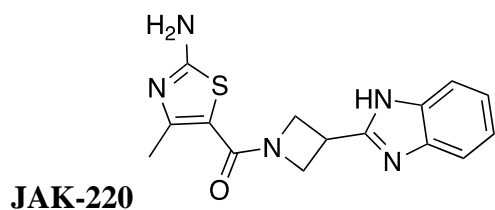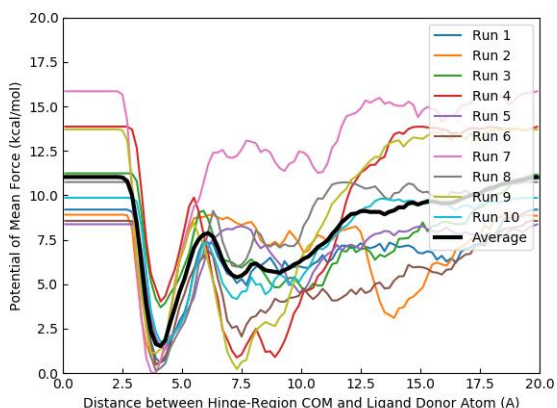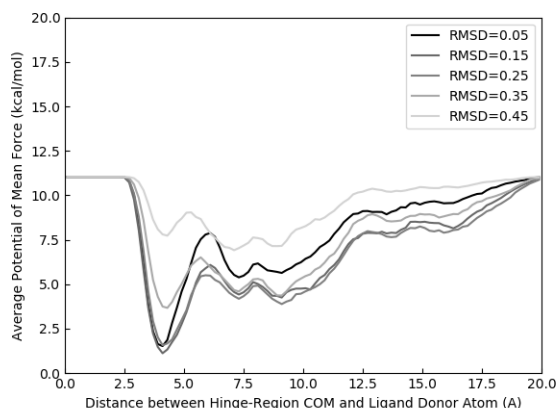

**Figure S6.23.** (a) JAK-220 Structure (b) PMF curve of JH2/JAK-220 unbinding at 0.05 Å Val629 backbone RMSD (c) PMF curves of JH2/JAK-220 unbinding at highly-sampled Val629 backbone RMSDs. All PMF curves converged from 0 until at least 10 angstroms.

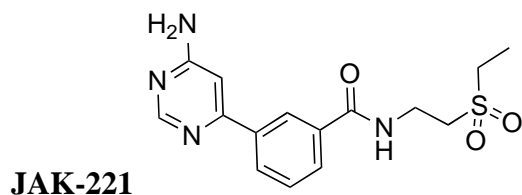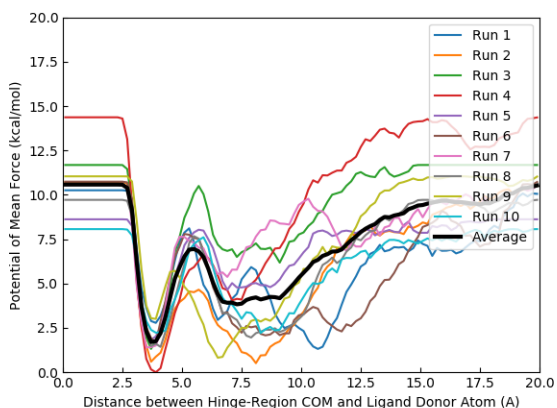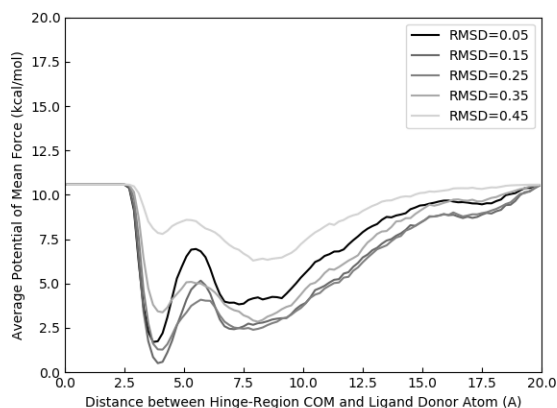

**Figure S6.24.** (a) JAK-221 structure (b) PMF curve of JH2/JAK-221 unbinding at 0.05 Å Val629 backbone RMSD (c) PMF curves of JH2/JAK-221 unbinding at highly-sampled Val629 backbone RMSDs. All PMF curves converged from 0 until at least 10 angstroms.

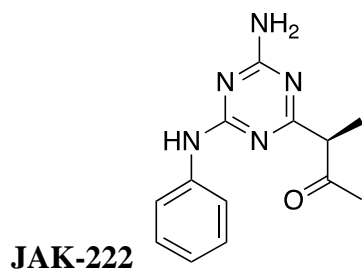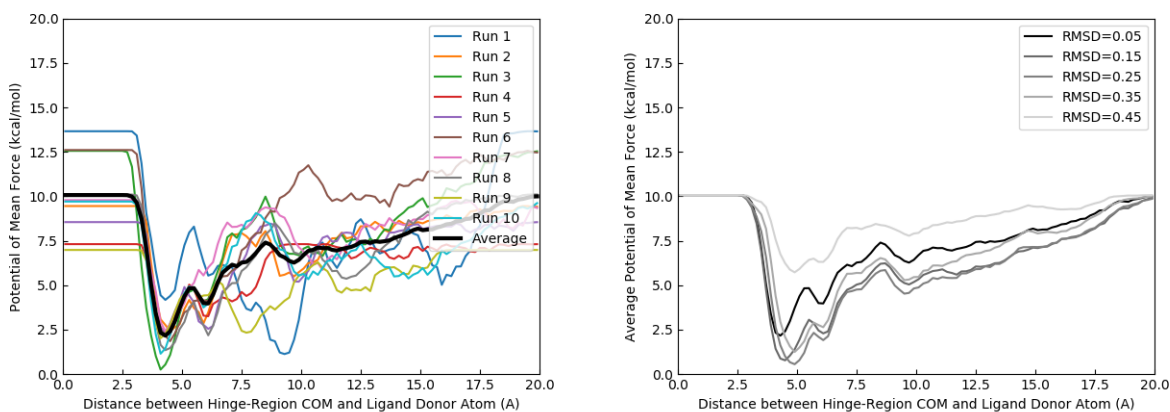

**Figure S6.25.** (a) JAK-222 structure (b) PMF curve of JH2/JAK-222 unbinding at 0.05 Å Val629 backbone RMSD (c) PMF curves of JH2/JAK-222 unbinding at highly-sampled Val629 backbone RMSDs. All PMF curves converged from 0 until at least 10 angstroms.

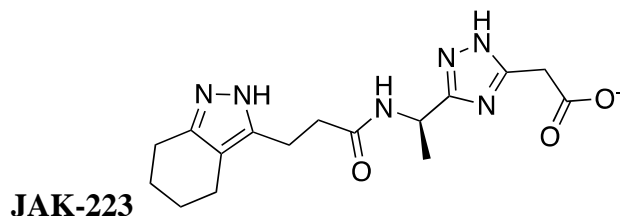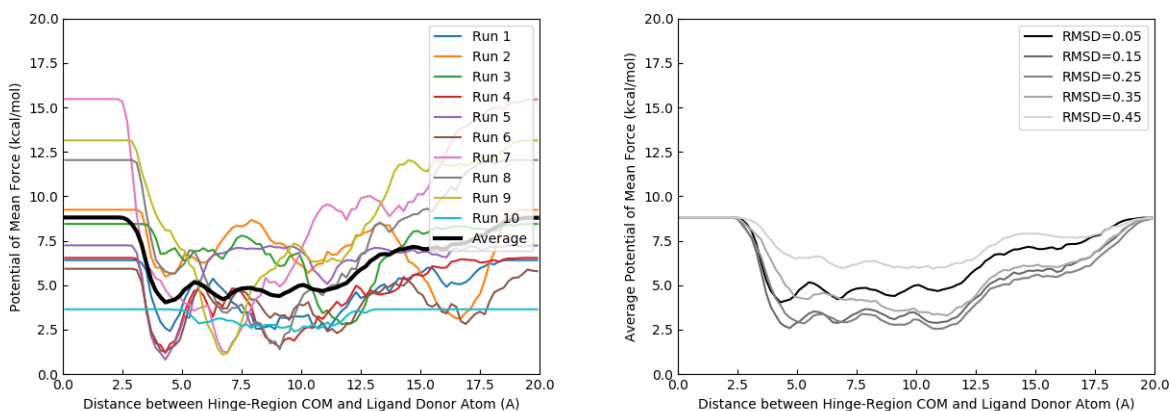

**Figure S6.26.** (a) JAK-223 structure (b) PMF curve of JH2/JAK-223 unbinding at 0.05 Å Val629 backbone RMSD (c) PMF curves of JH2/JAK-223 unbinding at highly-sampled Val629 backbone RMSDs. All PMF curves converged from 0 until at least 10 angstroms.



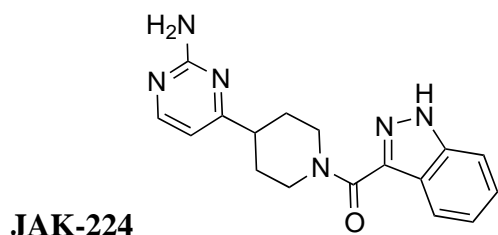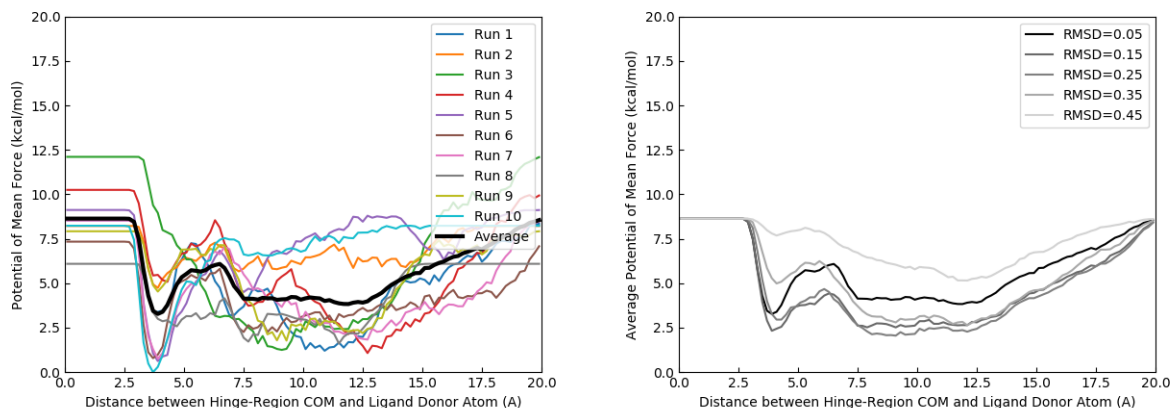

**Figure S6.27.** (a) JAK-224 structure (b) PMF curve of JH2/JAK-224 unbinding at 0.05 Å Val629 backbone RMSD (c) PMF curves of JH2/JAK-224 unbinding at highly-sampled Val629 backbone RMSDs. All PMF curves converged from 0 until at least 10 angstroms.

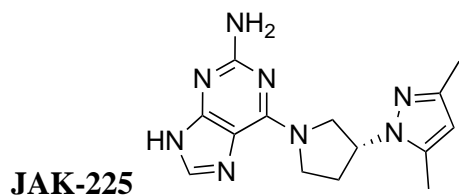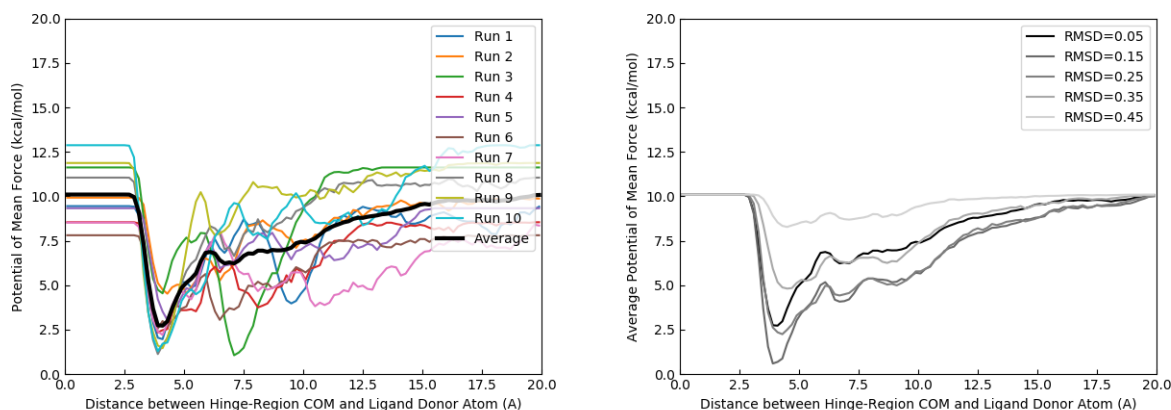

**Figure S6.28.** (a) JAK-225 structure (b) PMF curve of JH2/JAK-225 unbinding at 0.05 Å Val629 backbone RMSD (c) PMF curves of JH2/JAK-225 unbinding at highly-sampled Val629 backbone RMSDs. All PMF curves converged from 0 until at least 10 angstroms.

### JAK-226

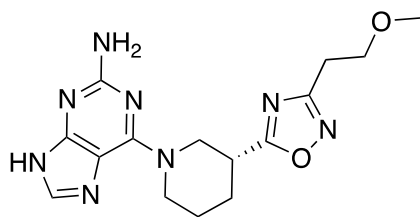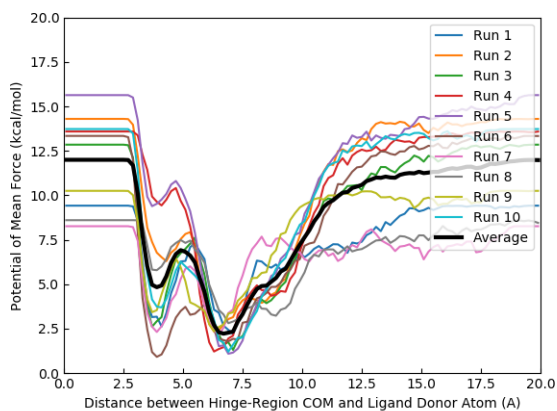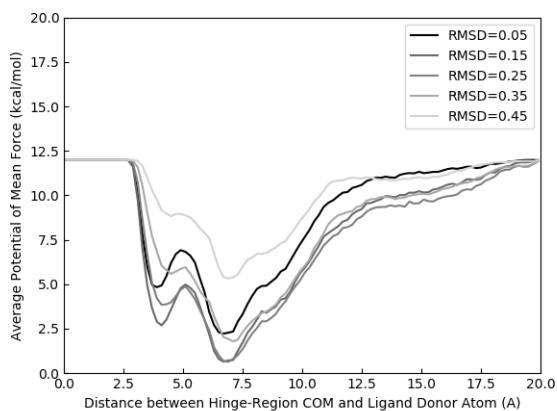

**Figure S6.29.** (a) JAK-226 structure (b) PMF curve of JH2/JAK-226 unbinding at 0.05 Å Val629 backbone RMSD (c) PMF curves of JH2/JAK-226 unbinding at highly-sampled Val629 backbone RMSDs. All PMF curves converged from 0 until at least 10 angstroms

### JAK-227

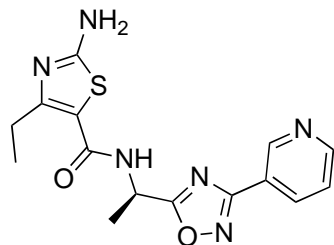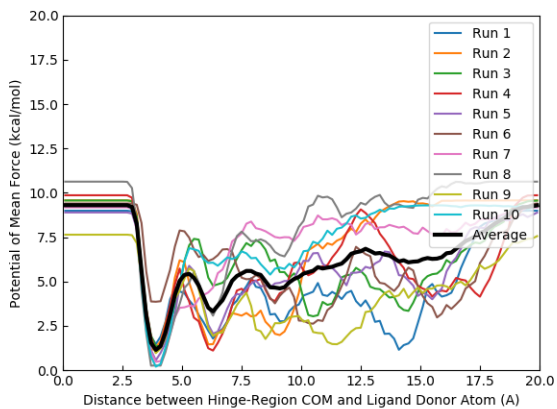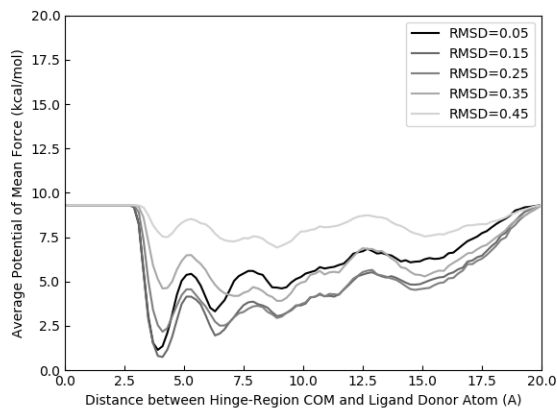

**Figure S6.30.** (a) JAK-227 structure (b) PMF curve of JH2/JAK-227 unbinding at 0.05 Å Val629 backbone RMSD (c) PMF curves of JH2/JAK-227 unbinding at highly-sampled Val629 backbone RMSDs. All PMF curves converged from 0 until at least 10 angstroms.
